# Supplementary material
Source: PubMed Central journal article supplement (PMC9365341)
Supplement: ccr-21-2096_supp.pdf [file ccr-21-2096_supp.pdf]

**Supplementary Material to:**

Westphalen CB, Fine AD, Andre F et al. 2021.

Pan-cancer Analysis of Homologous Recombination Repair-associated Gene  
Alterations and Genome-wide Loss of Heterozygosity Score

- Supplementary Figures S1-S10
- Supplementary Tables S1-S8

## Supplementary Figures

### Supplementary Figure 1.

Graphic of biallelic and monoallelic alteration callings. LOH, loss of heterozygosity; wt, wildtype.

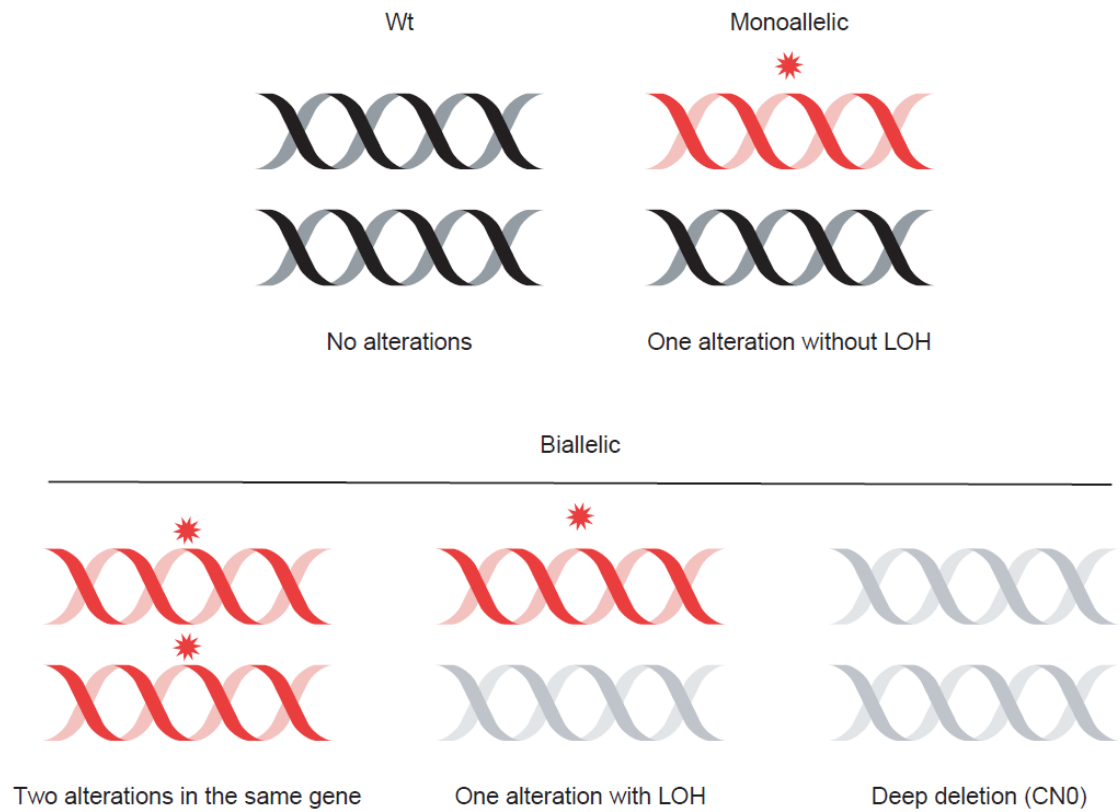

## Supplementary Figure 2.

Cancer types represented in the study. CUP, carcinoma-of-unknown-primary-origin.

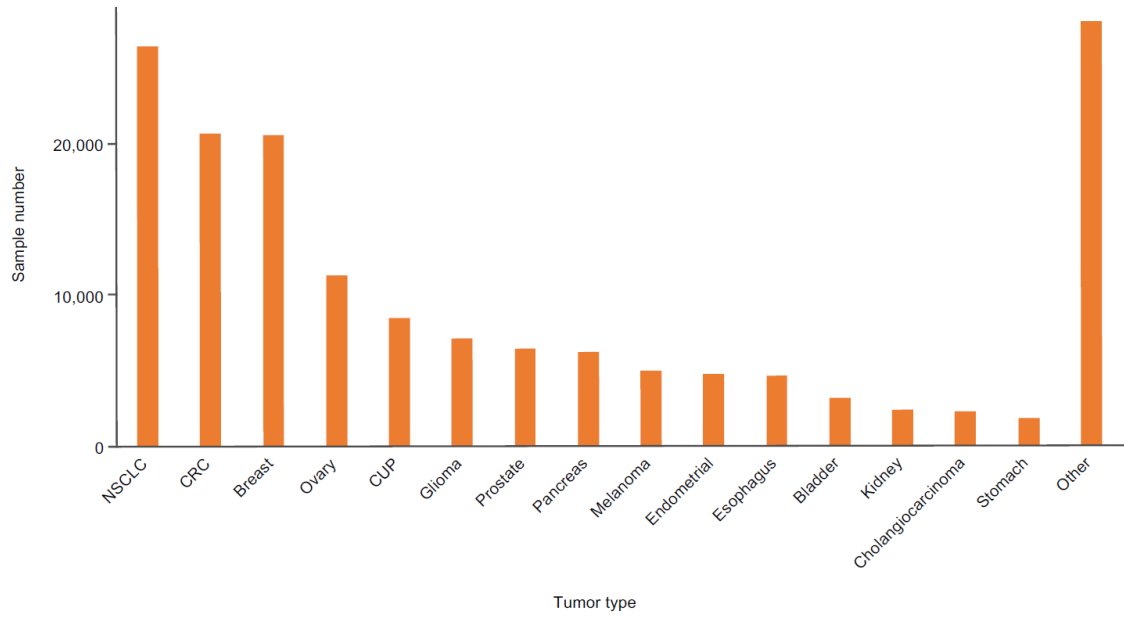

### Supplementary Figure 3.

Mutational landscape of the overall cohort. CN, copy number; RE, rearrangement; SV, short variant; the top 20 most frequently altered genes are shown.

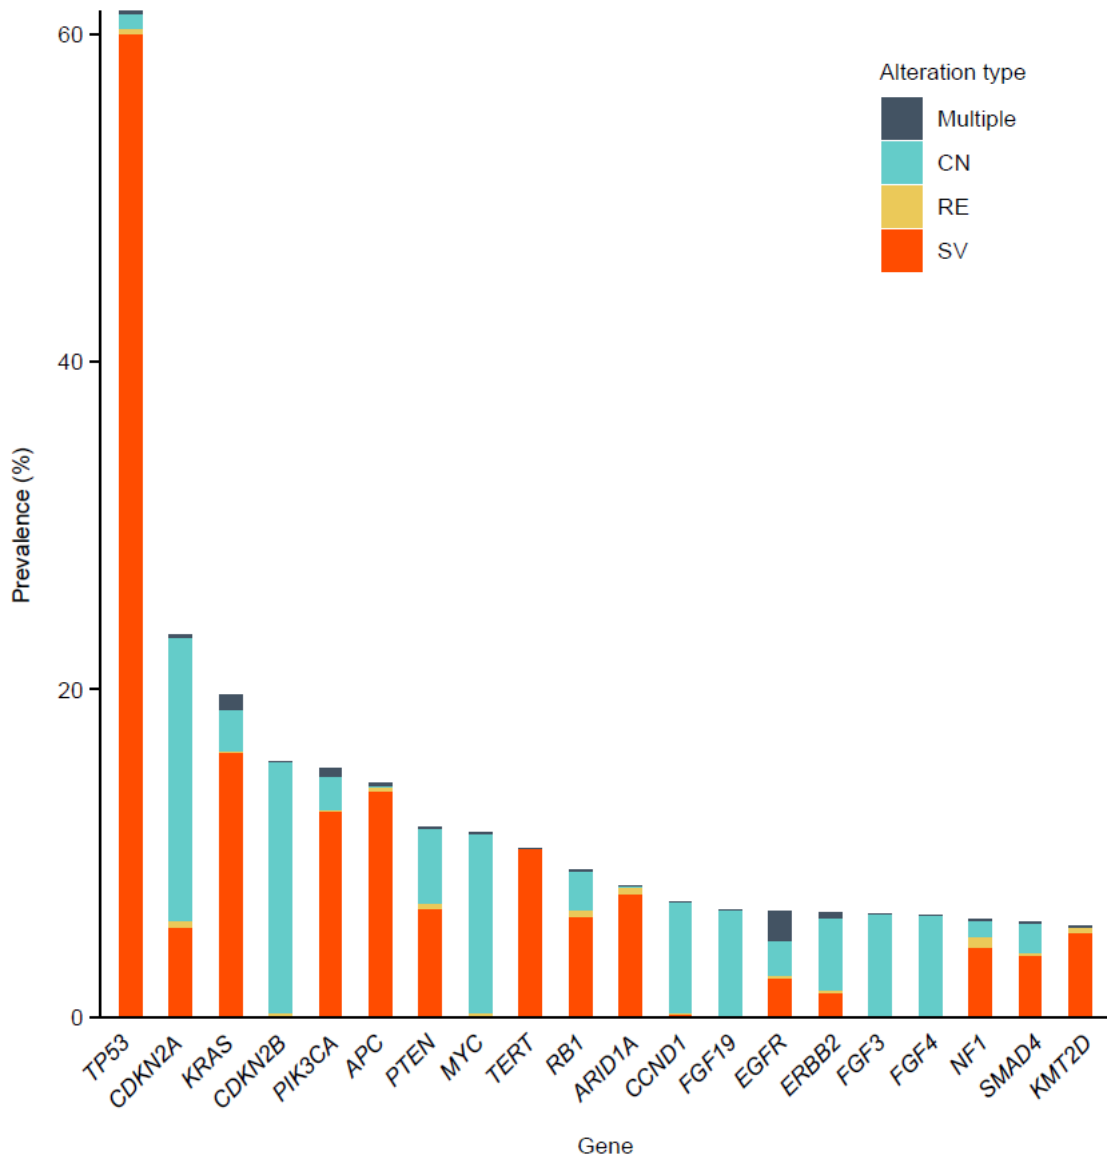

### Supplementary Figure 4.

Association of HRR-associated gene alterations with biallelic loss in **A**, breast, **B**, ovarian, **C**, pancreatic, **D**, prostate, **E**, bladder, **F**, cholangiocarcinoma, **G**, CRC, **H**, CUP, **I**, endometrial, **J**, esophageal, **K**, glioma, **L**, kidney, **M**, melanoma, **N**, NSCLC, **O**, stomach, and **P**, other cancers. CUP, carcinoma-of-unknown-primary-origin.

**A**

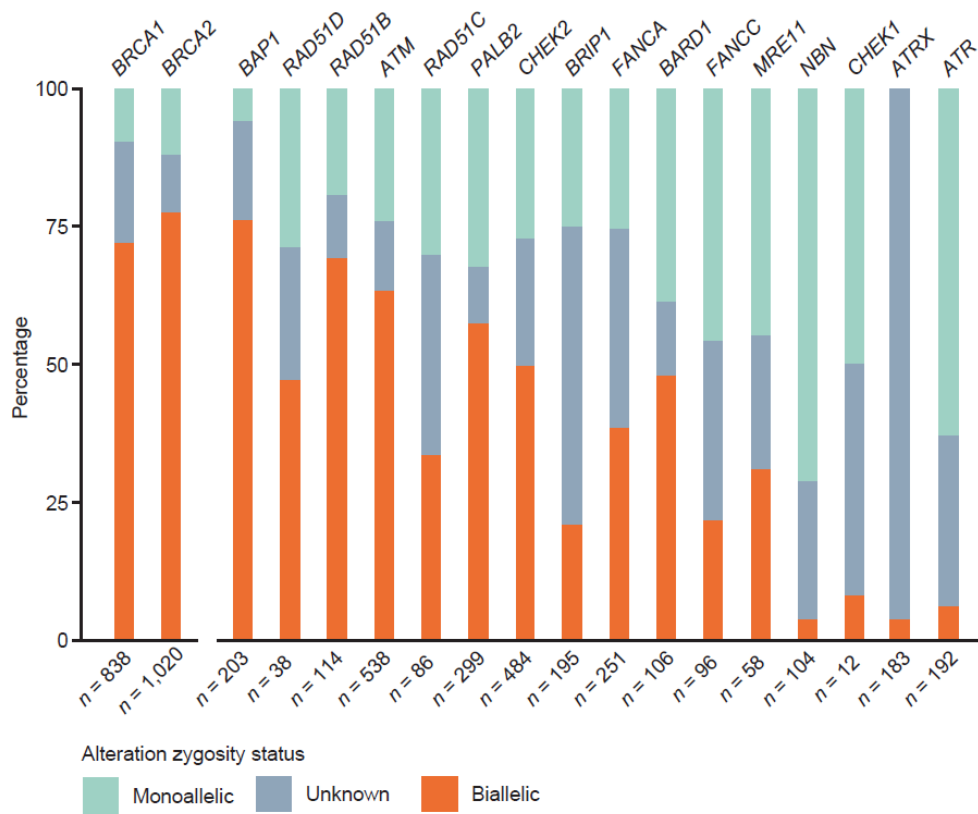

**B**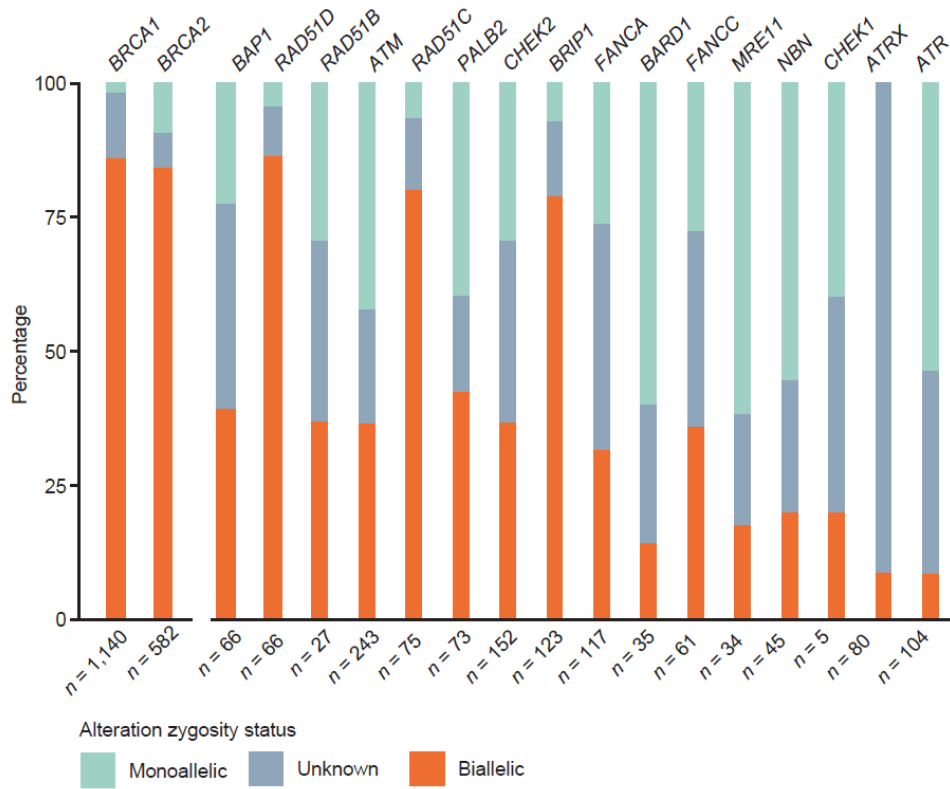**C**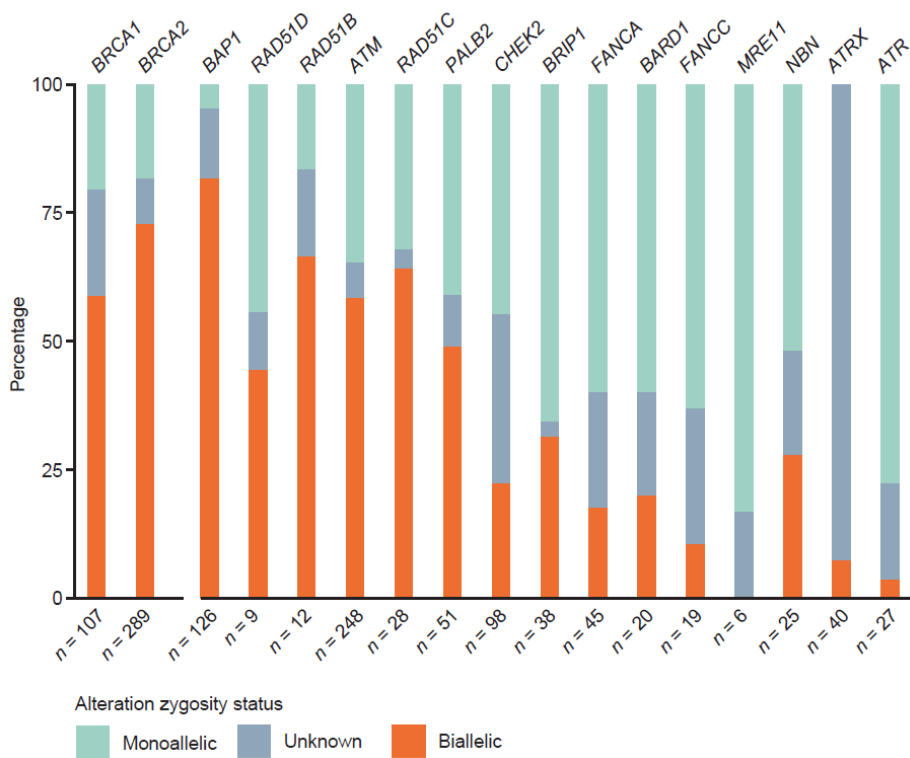

**D**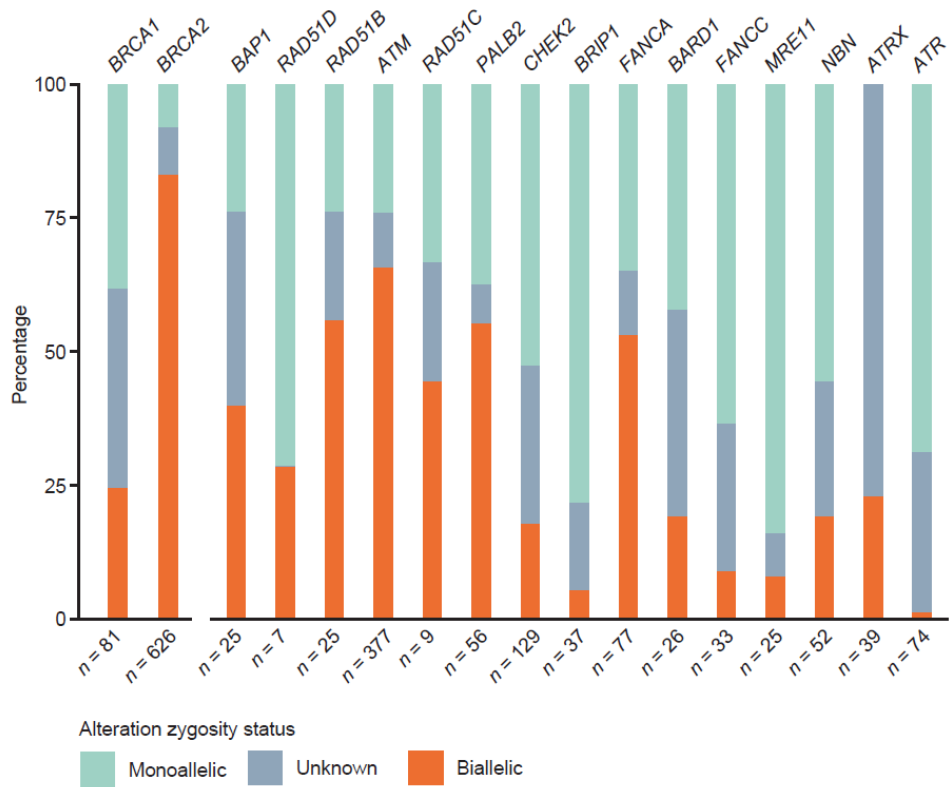**E**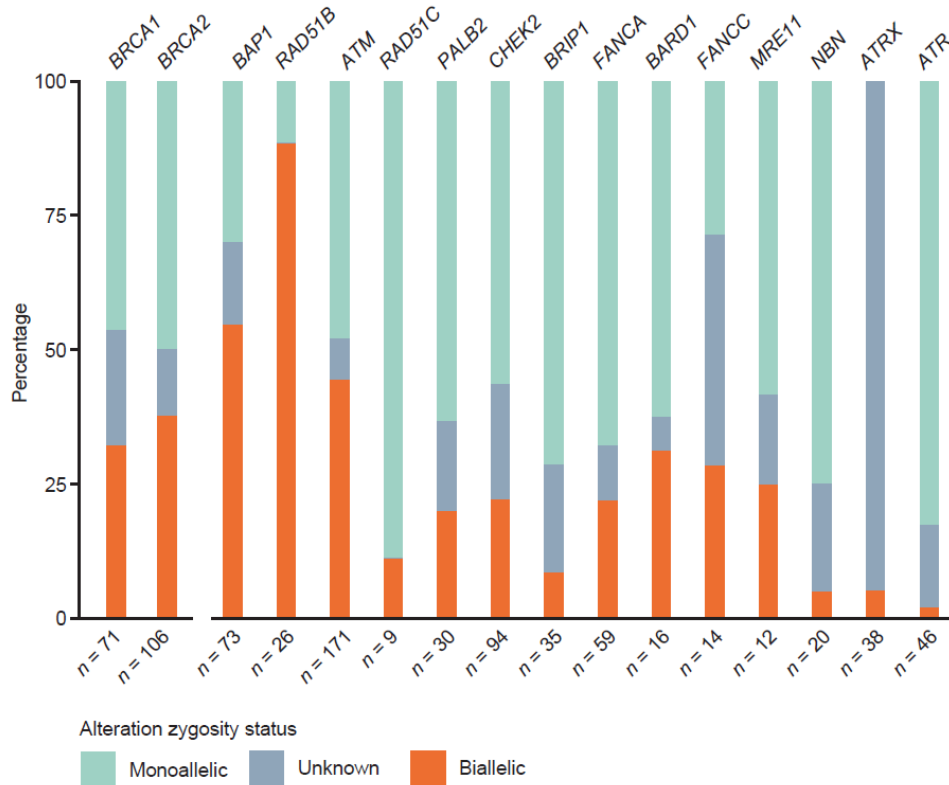

**F**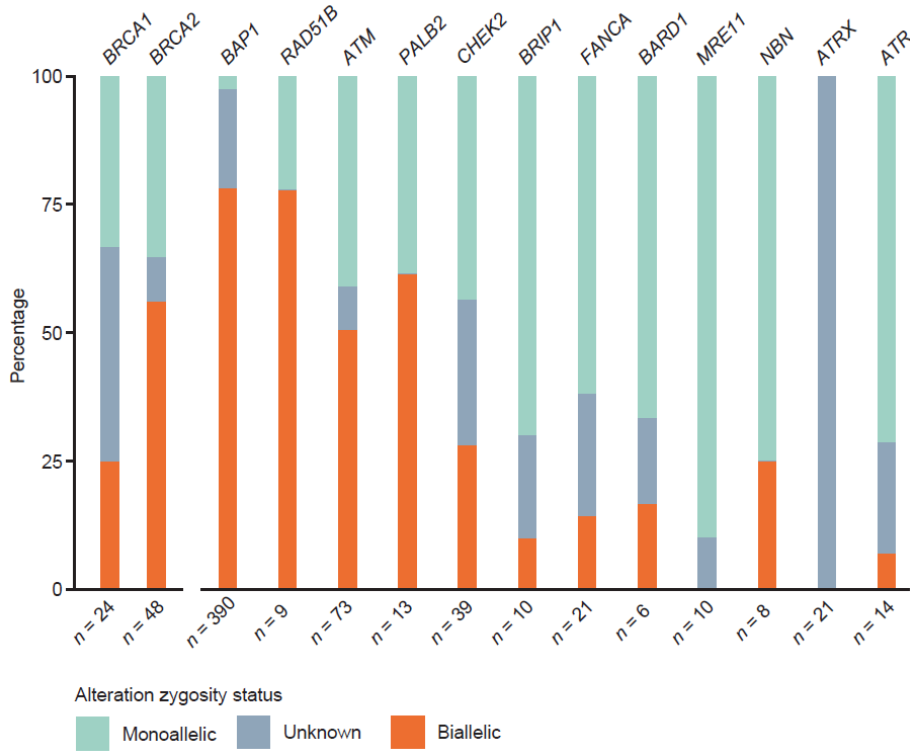**G**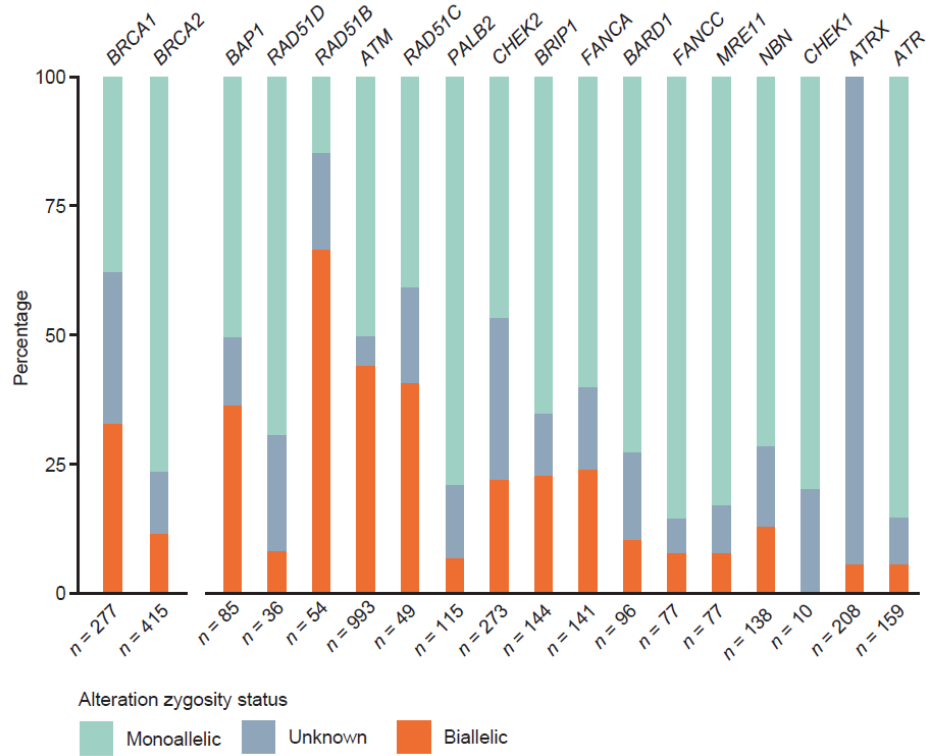



**H**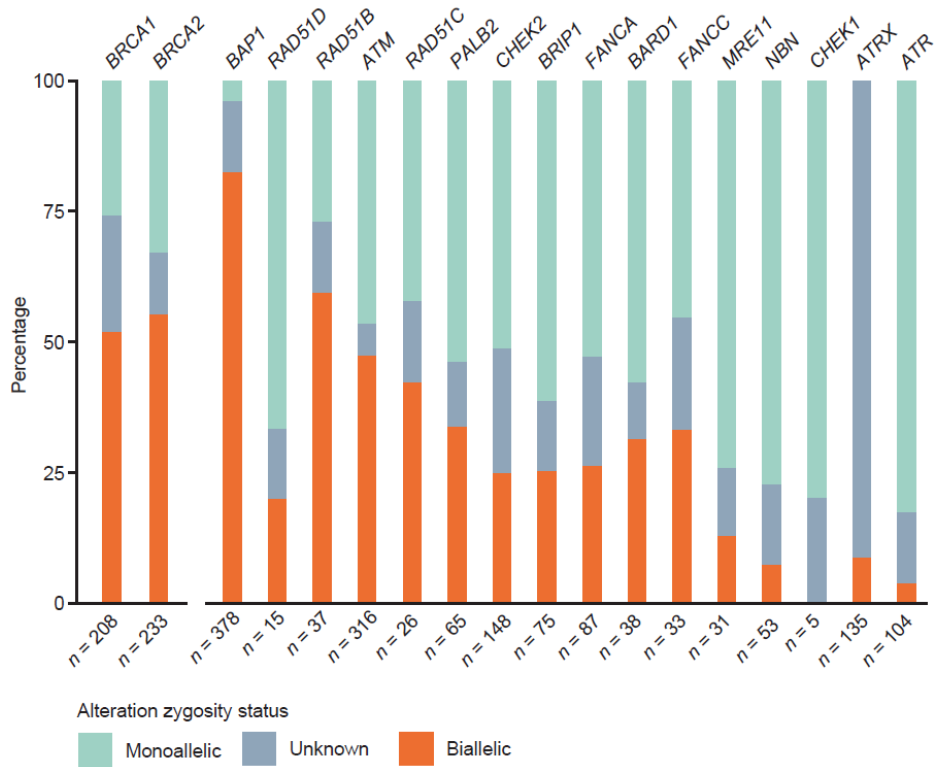**I**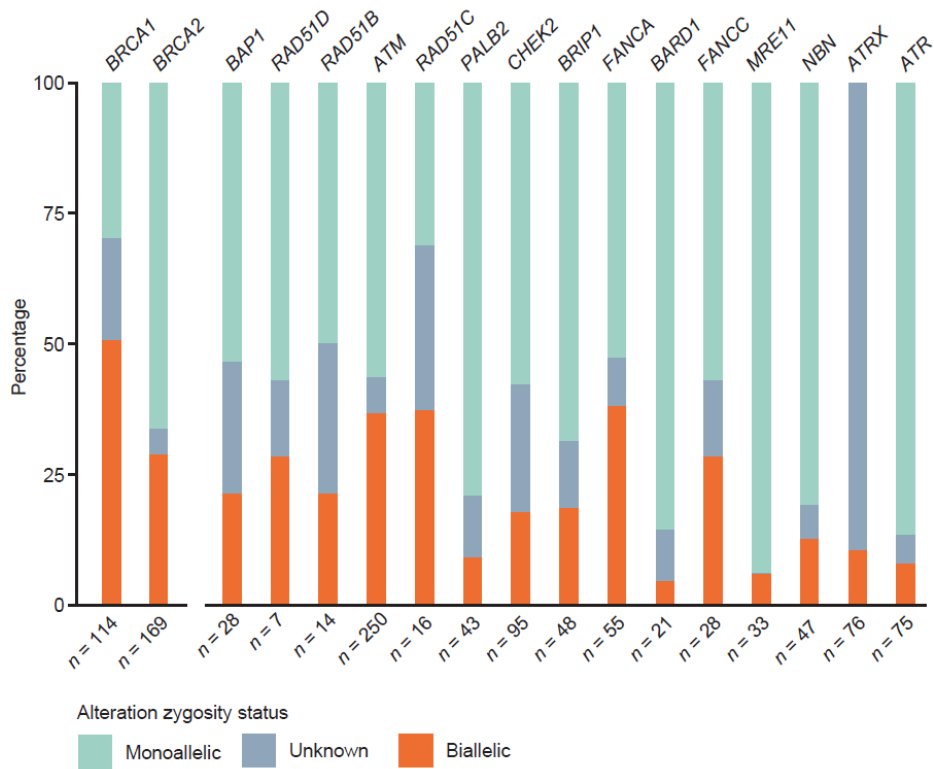

**J**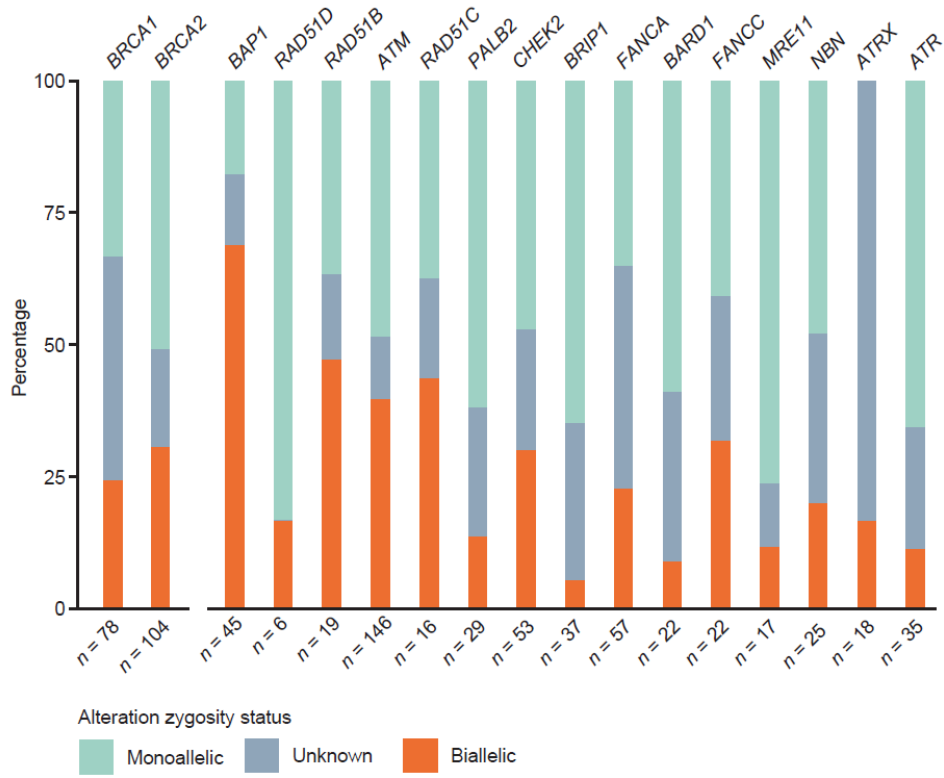**K**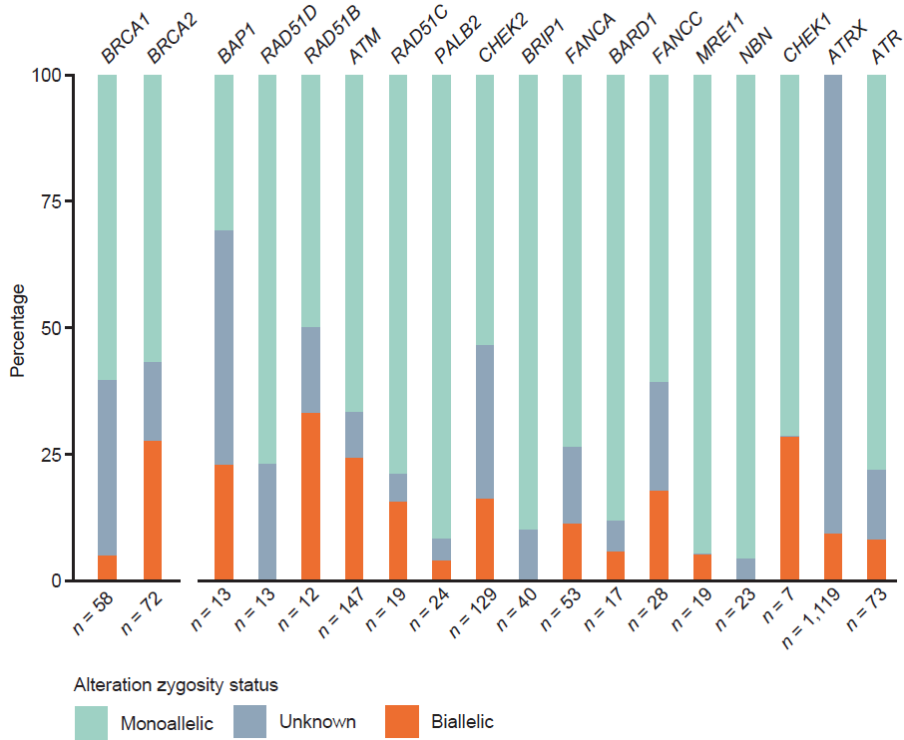

**L**

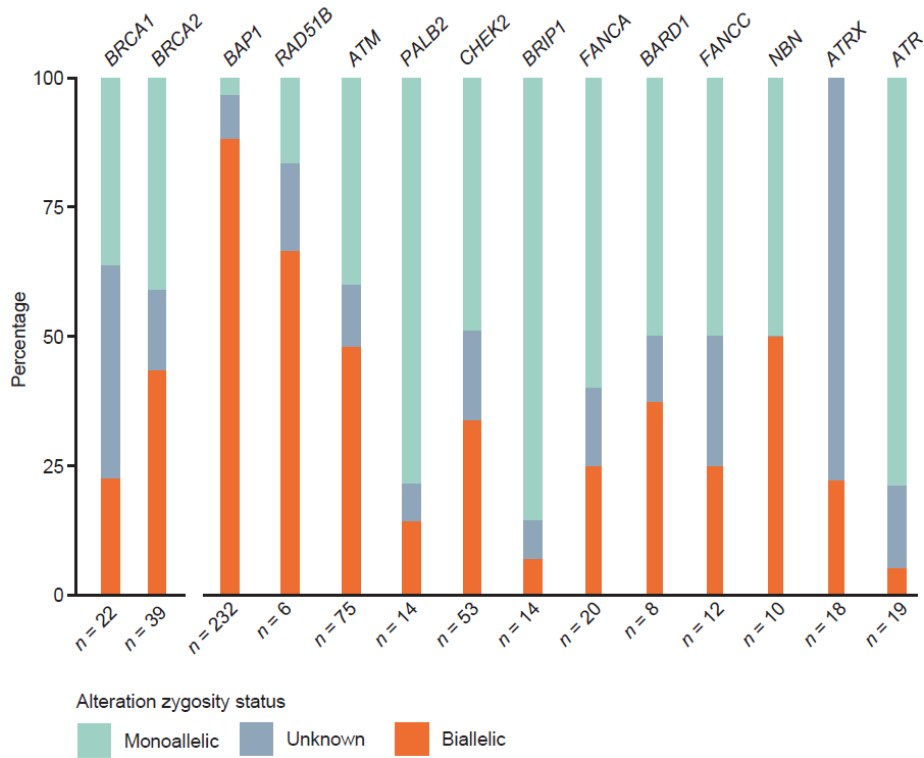

**M**

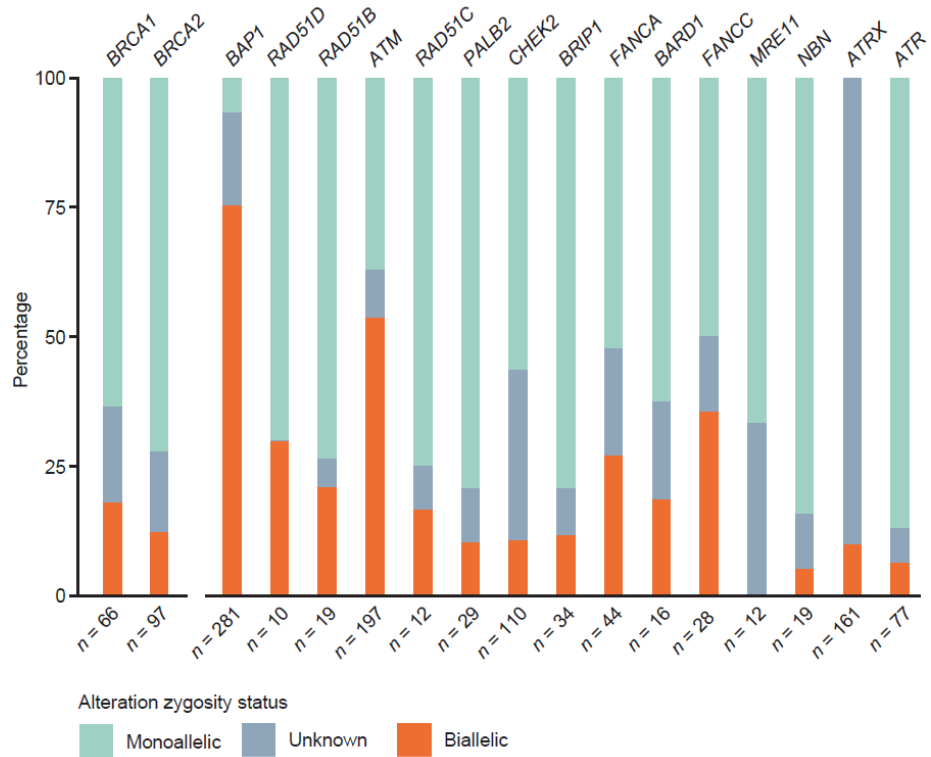

N

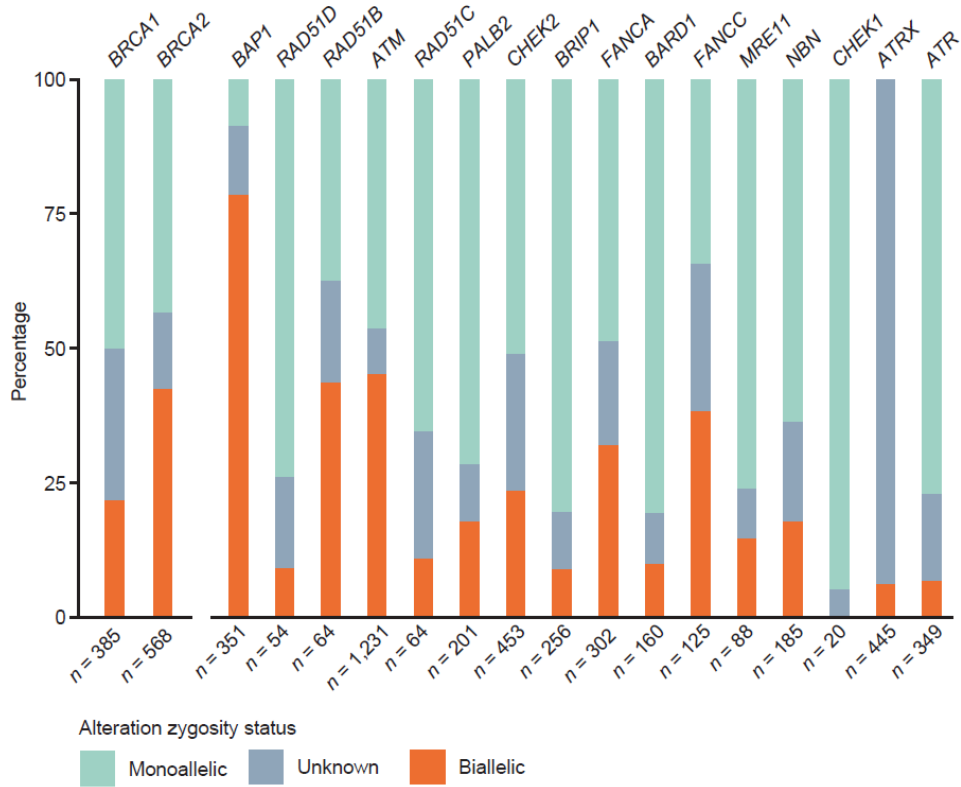

O

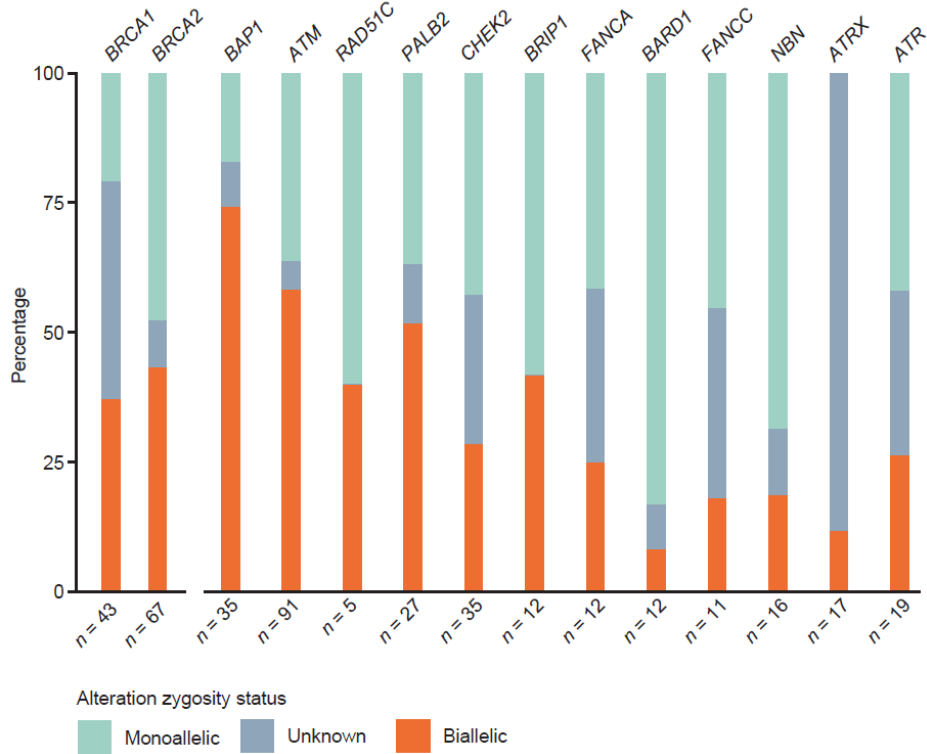

P

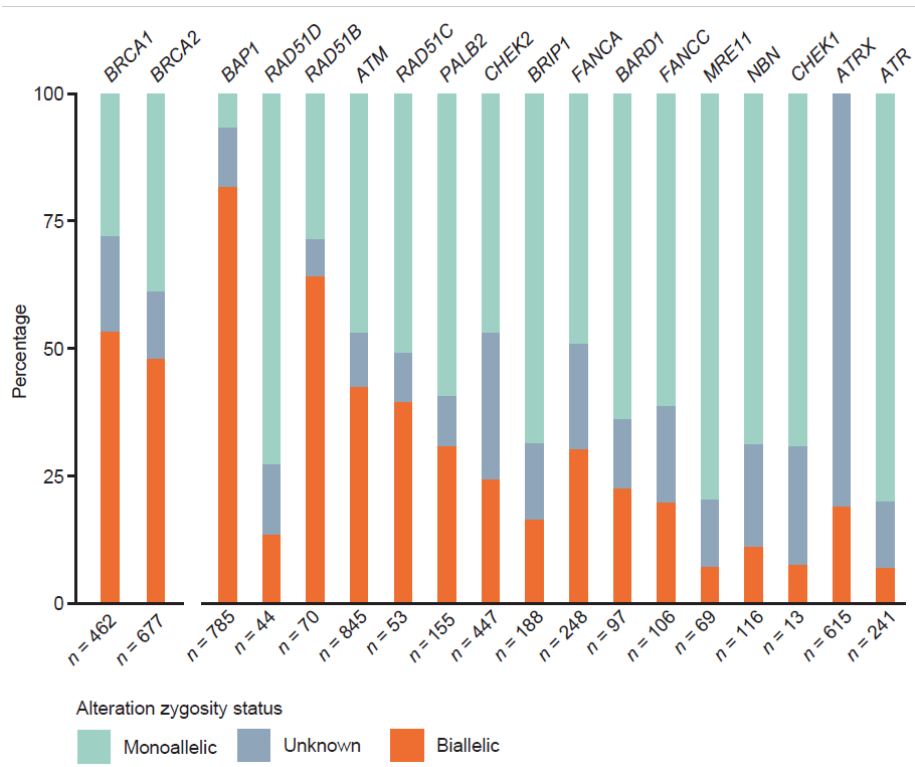

### Supplementary Figure 5.

Association of HRR-associated gene alterations of predicted germline origin with biallelic loss.

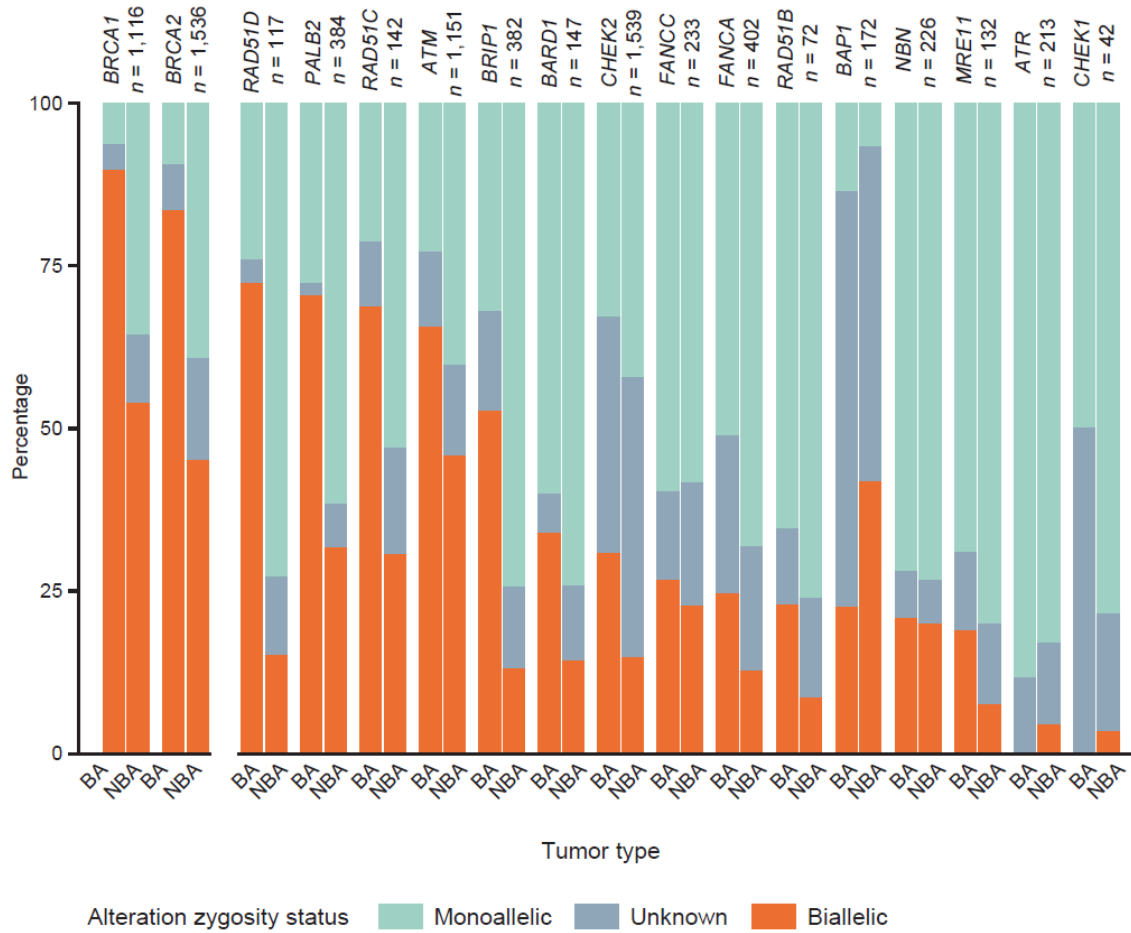

### Supplementary Figure 6.

Association of gLOH with **A**, age and **B**, ancestry. AFR, African; AMR, Central and South American; CUP, carcinoma-of-unknown-primary-origin; EAS, East Asian; EUR, European; SAS, South Asian; asterisks denote level of significance after false discovery correction:

\* =  $P < 0.05$ ; \*\* =  $P < 0.01$ .

**A**

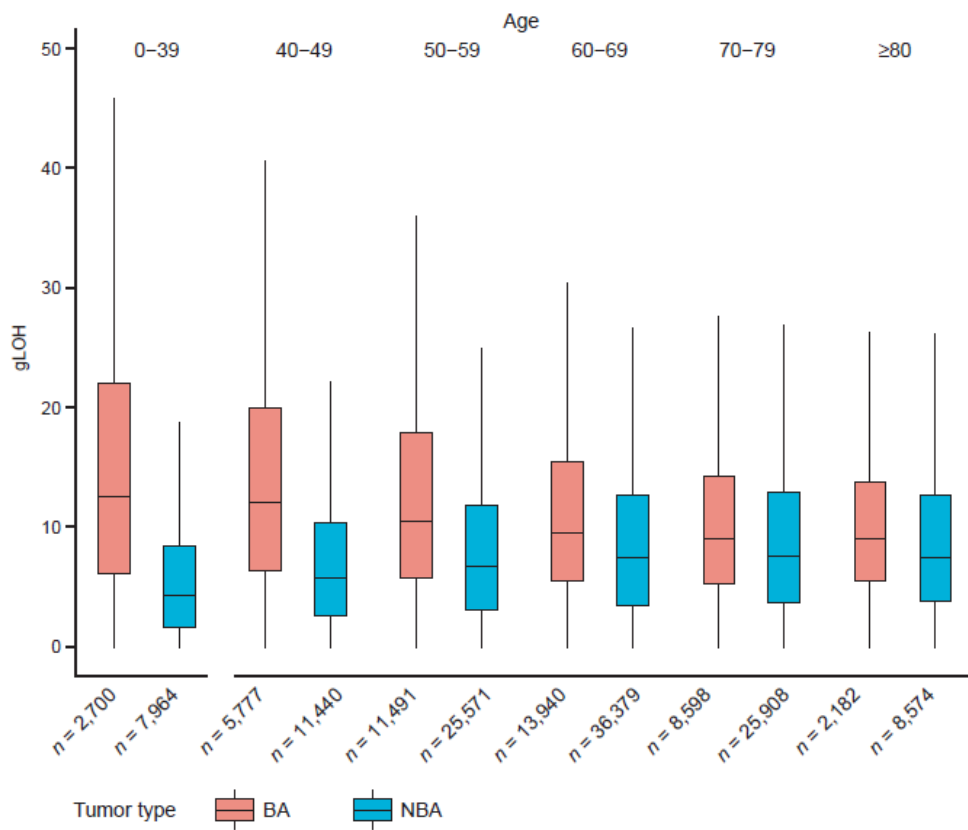

**B**

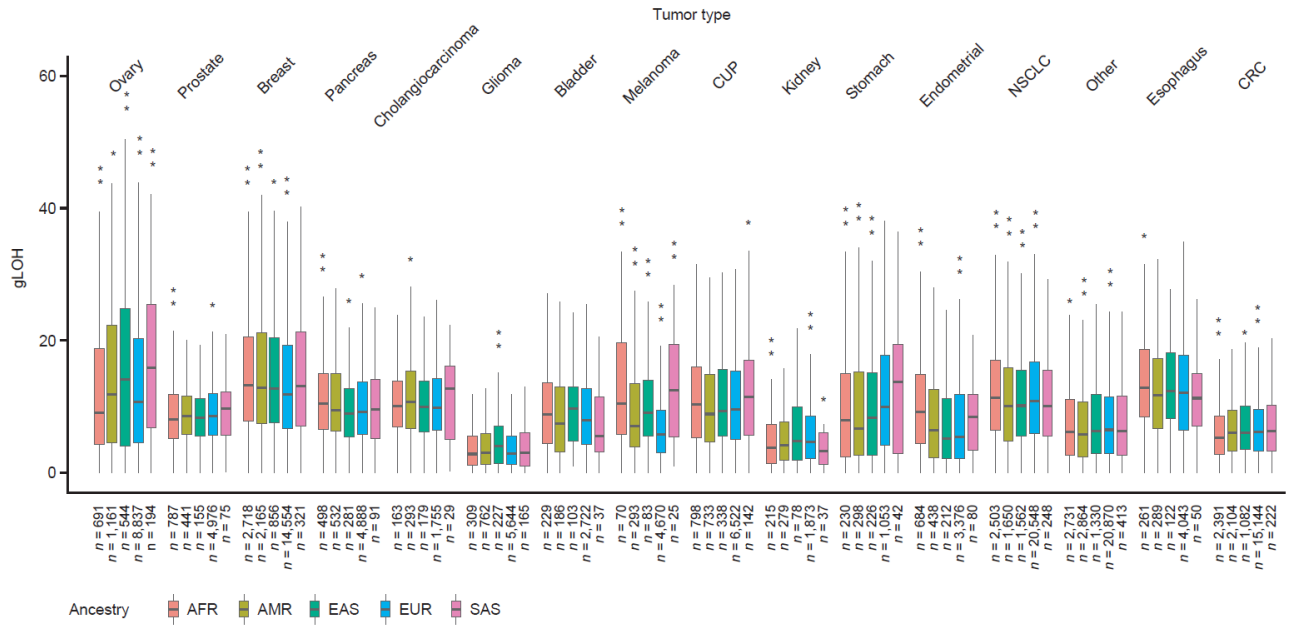



### Supplementary Figure 7.

Association of HRR gene alterations with gLOH by cancer type\*: **A**, breast, **B**, ovarian, **C**, prostate, **D**, pancreatic, **E**, CRC, and **F**, NSCLC. wt, wild type; \* Only genes with at least five assessable alterations in each category (biallelic, BA; monoallelic, NBA) were considered; wt refers to the gene being analyzed; *CHEK1* and *ATR* had too few samples to be assessable and were therefore excluded.

**A**

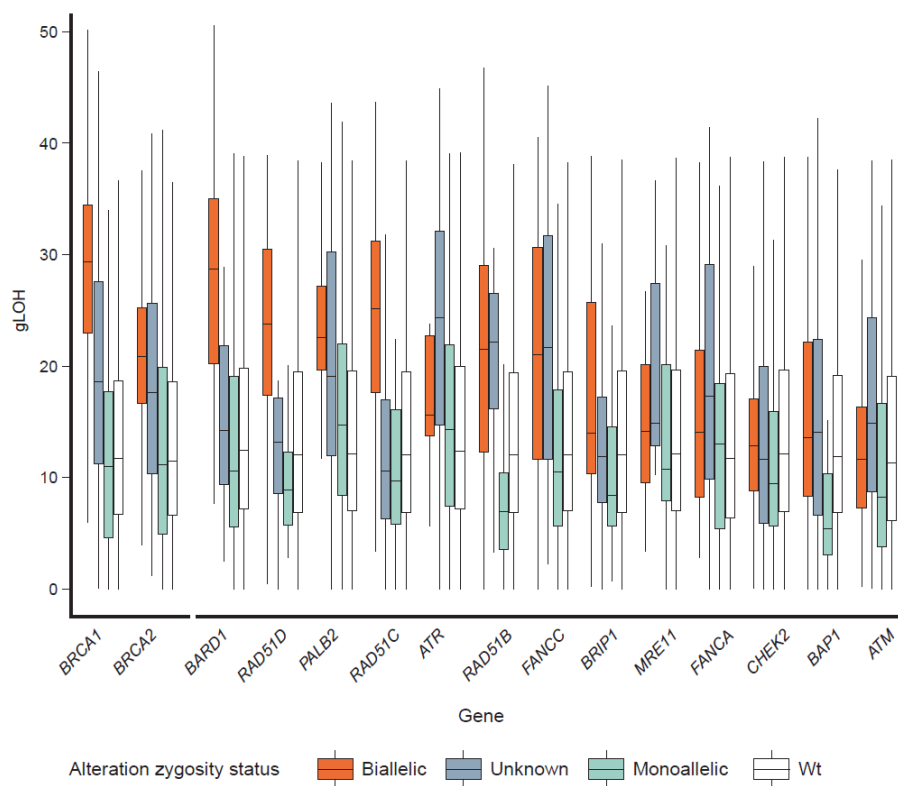

**B**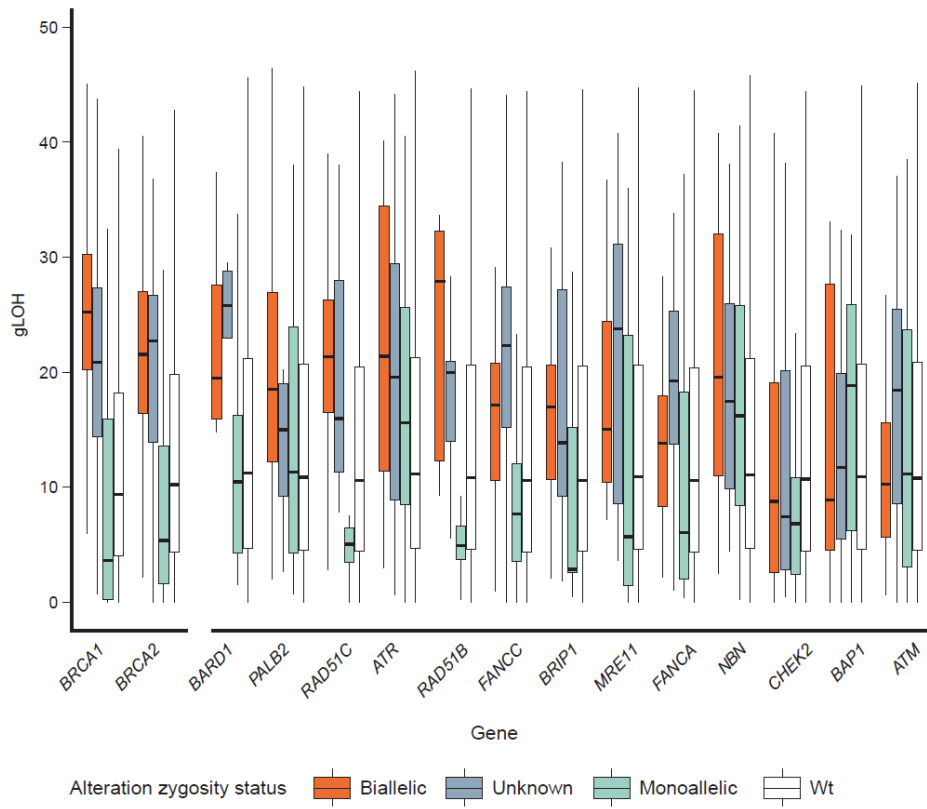**C**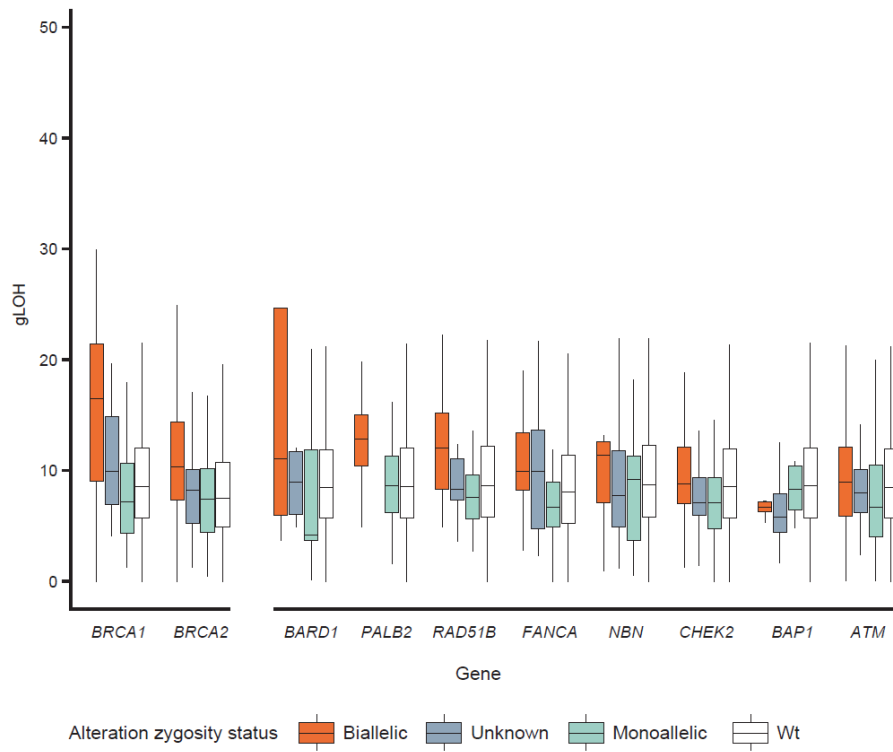

**D**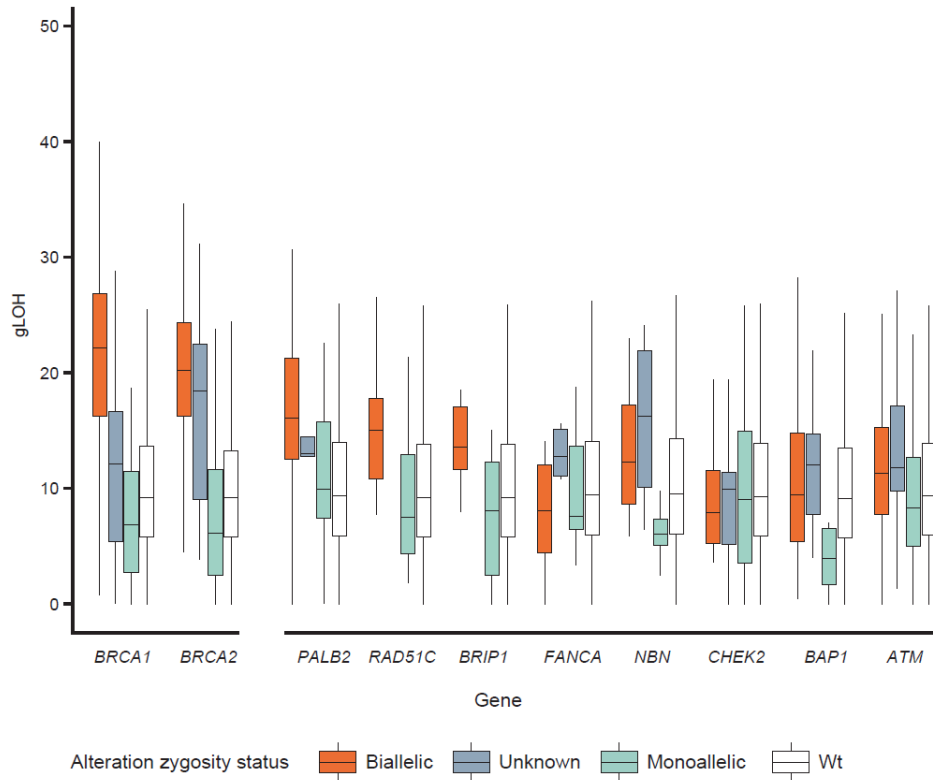**E**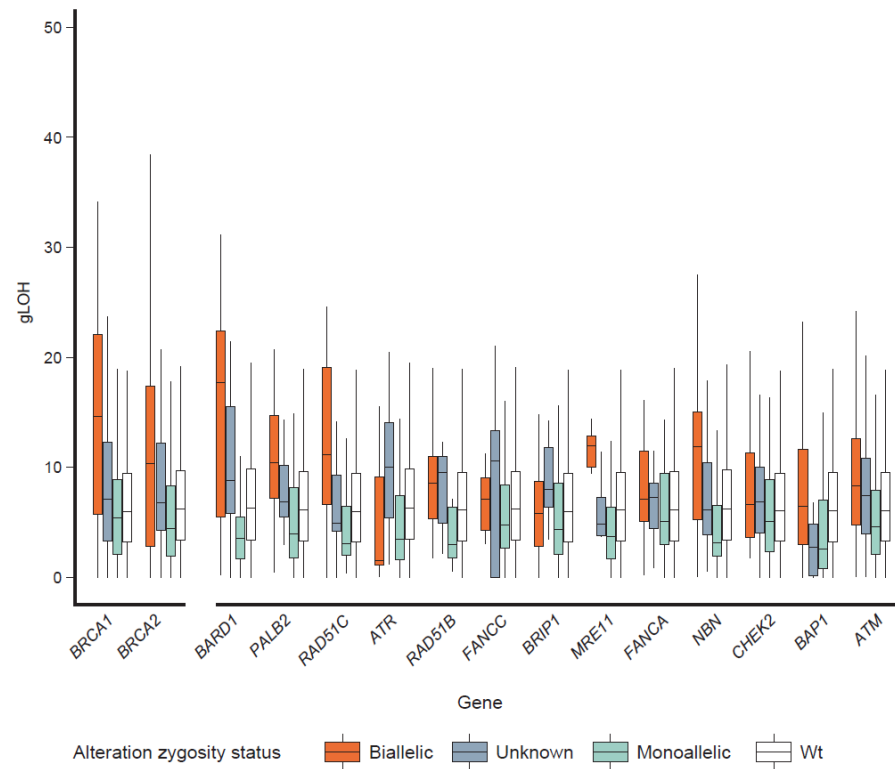

**F**

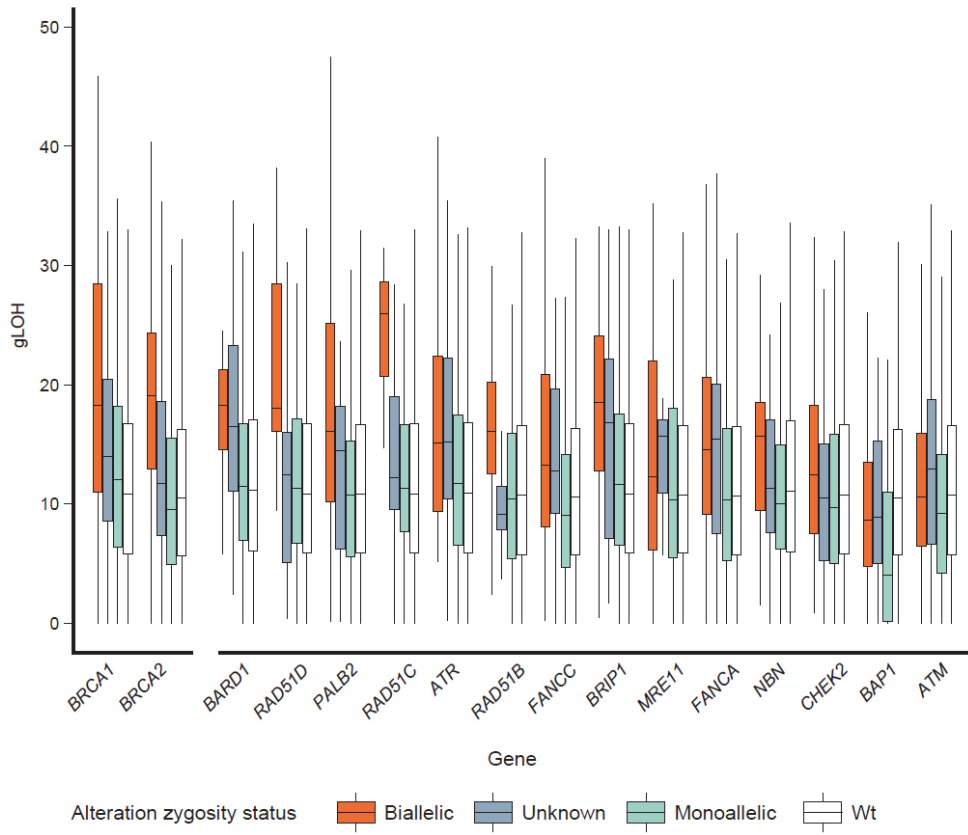

## Supplementary Figure 8.

Association between gene alterations and gLOH for: **A**, *ATM*, **B**, *CHEK2*, **C**, *BAP1*, **D**, *CTNNA1*, and **E**, *TP53*. CUP, carcinoma-of-unknown-primary-origin; wt, wild type.

**A**

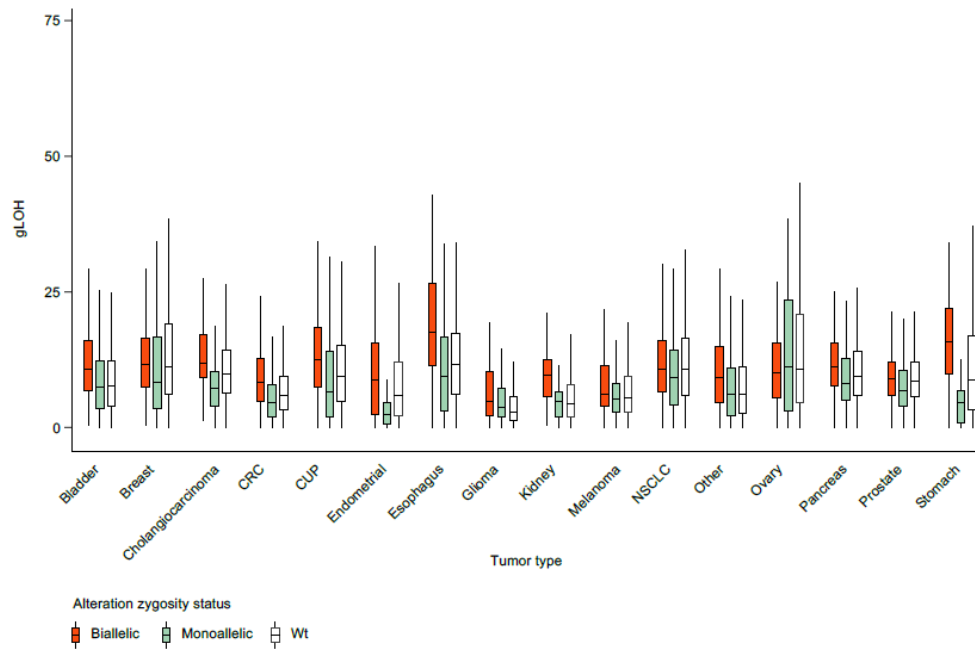

**B**

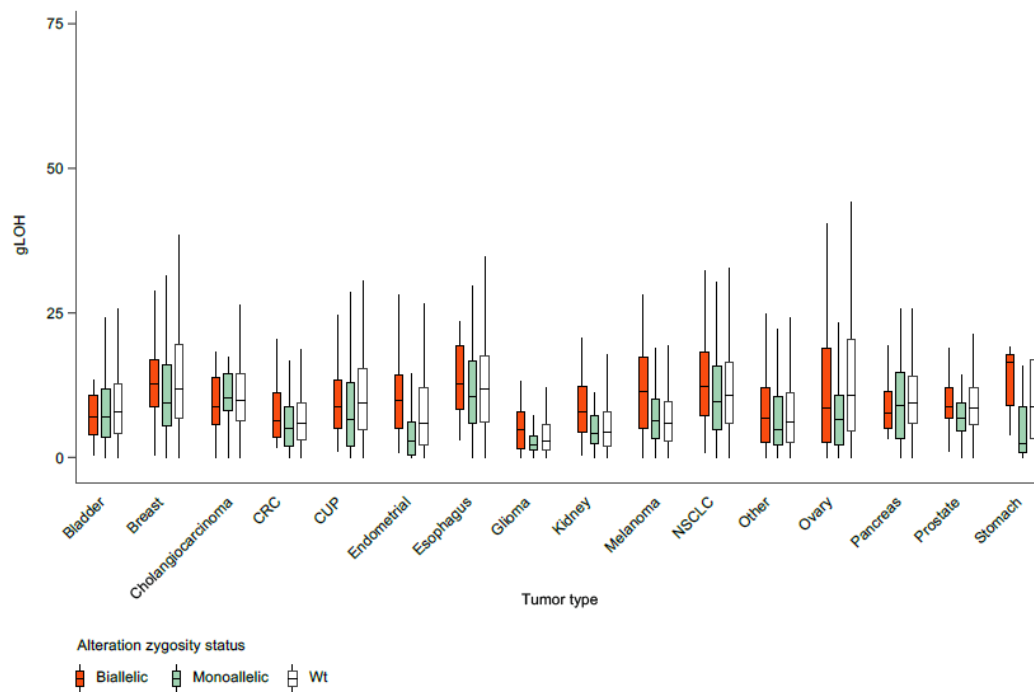

C

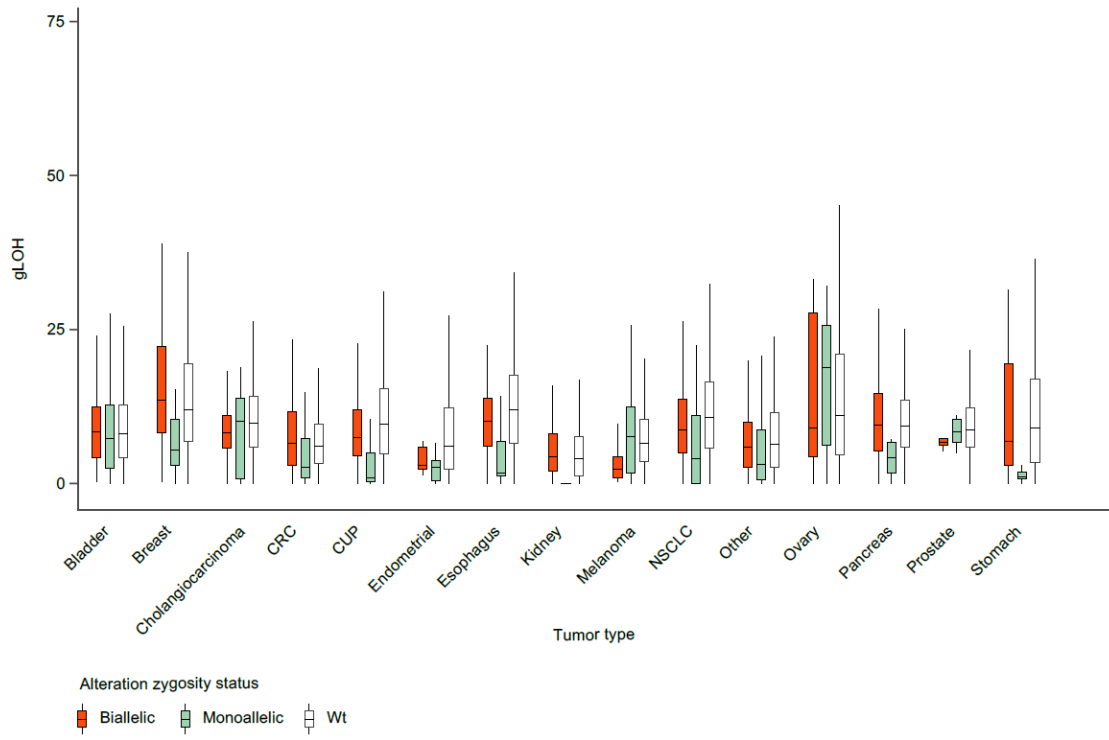

D

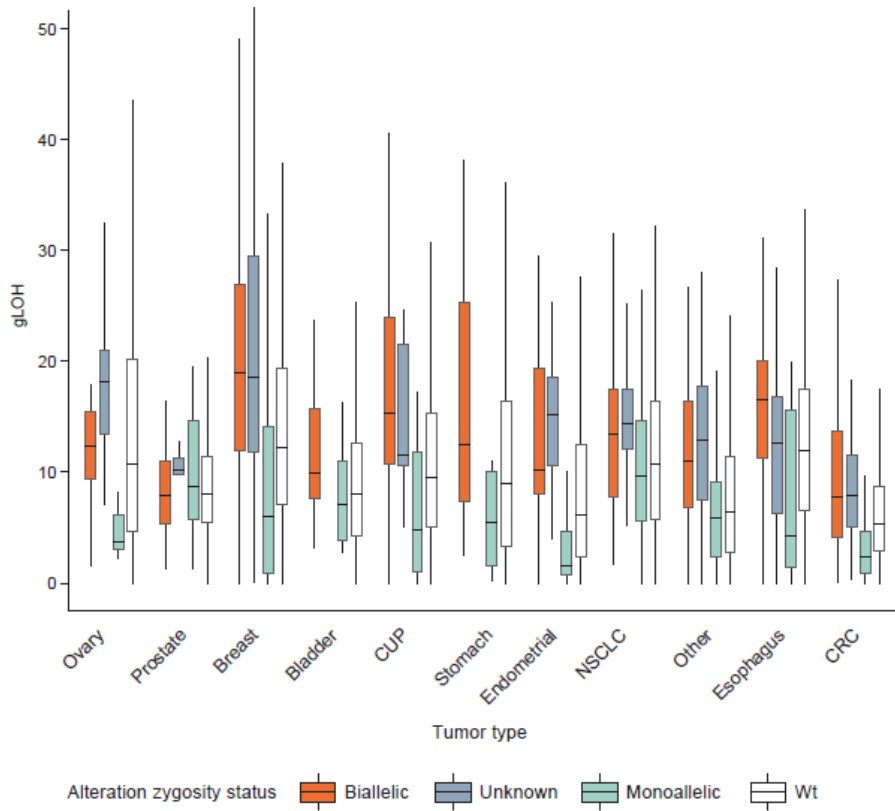

**E**

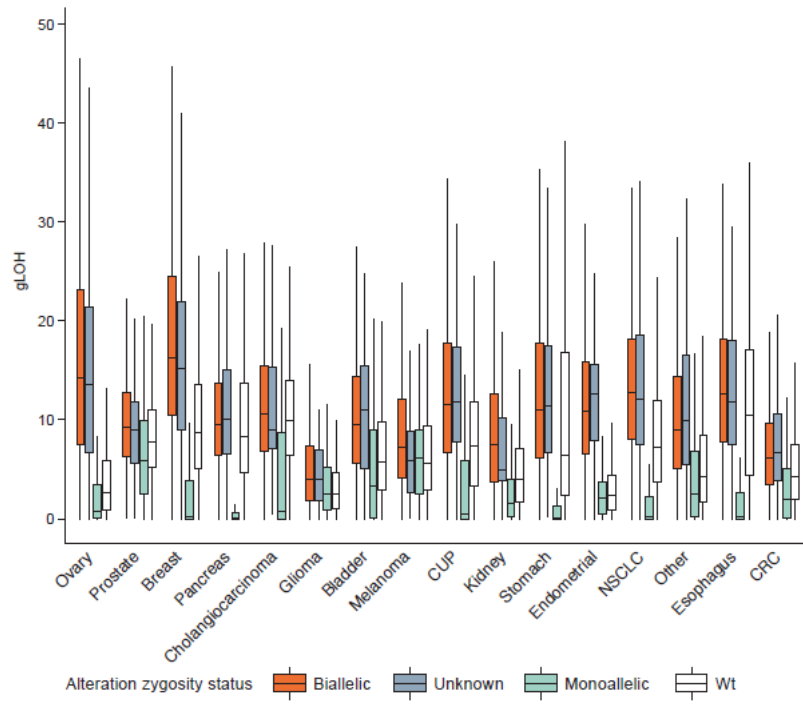

**Supplementary Figure 9.** Association of HRR-associated gene alterations and immune checkpoint inhibitor biomarkers: **A**, MSI and **B**, TMB. CUP, carcinoma-of-unknown-primary-origin; MSS, microsatellite stable; asterisks denote level of significance after false discovery correction: \* =  $P < 0.05$ ; \*\* =  $P < 0.01$ .

**A**

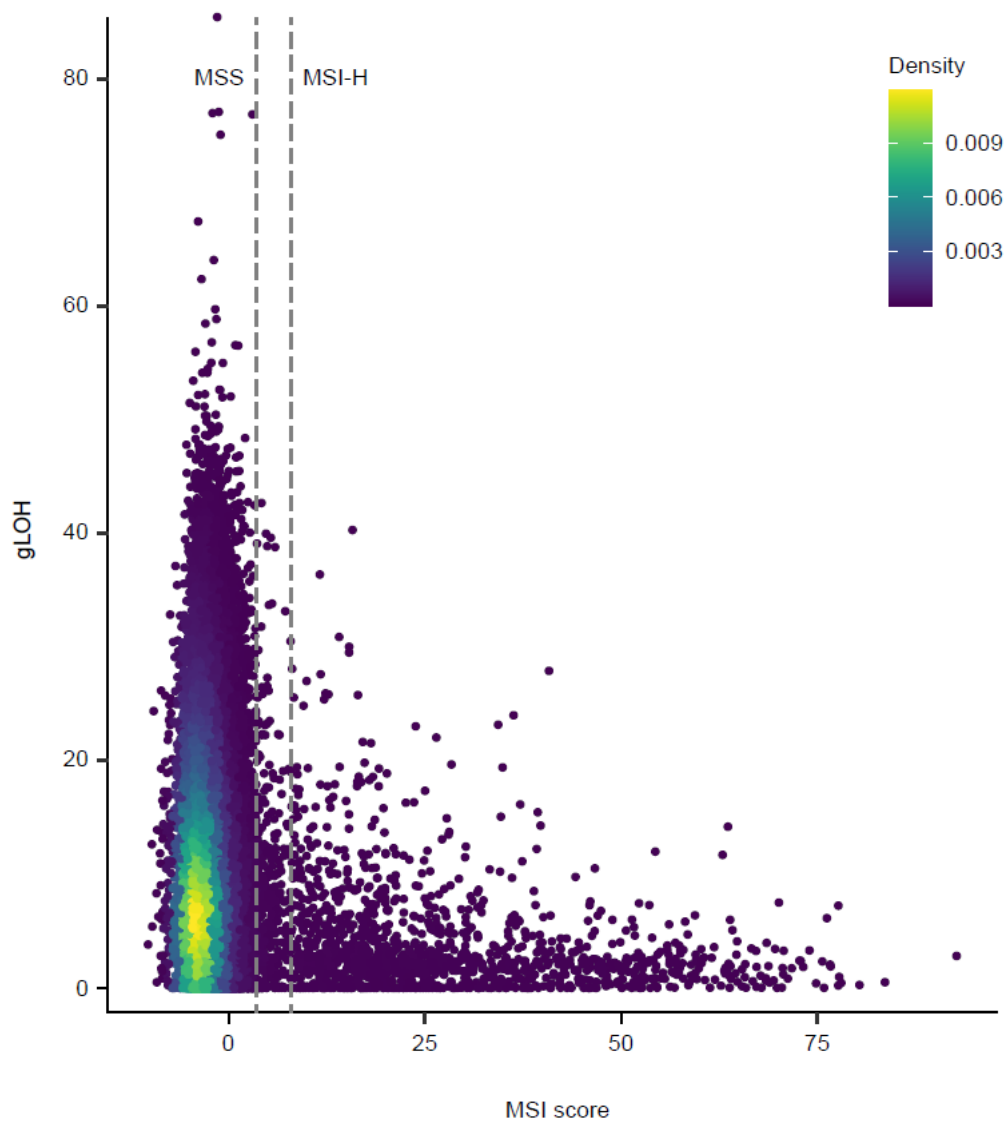



**B**

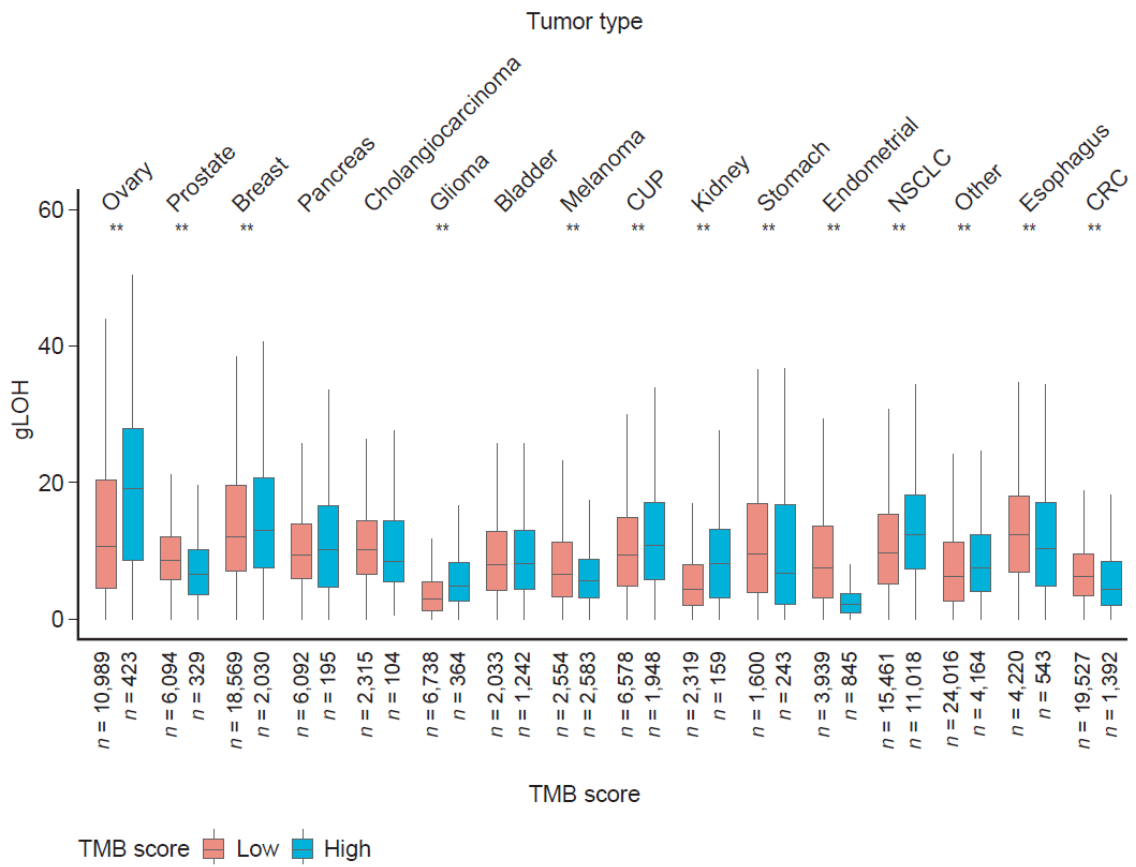

**Supplementary Figure 10.** Association of HRR-associated gene alterations with TMB: **A**, MSI and **B**, TMB. wt, wild type; wt refers to the gene being analyzed.

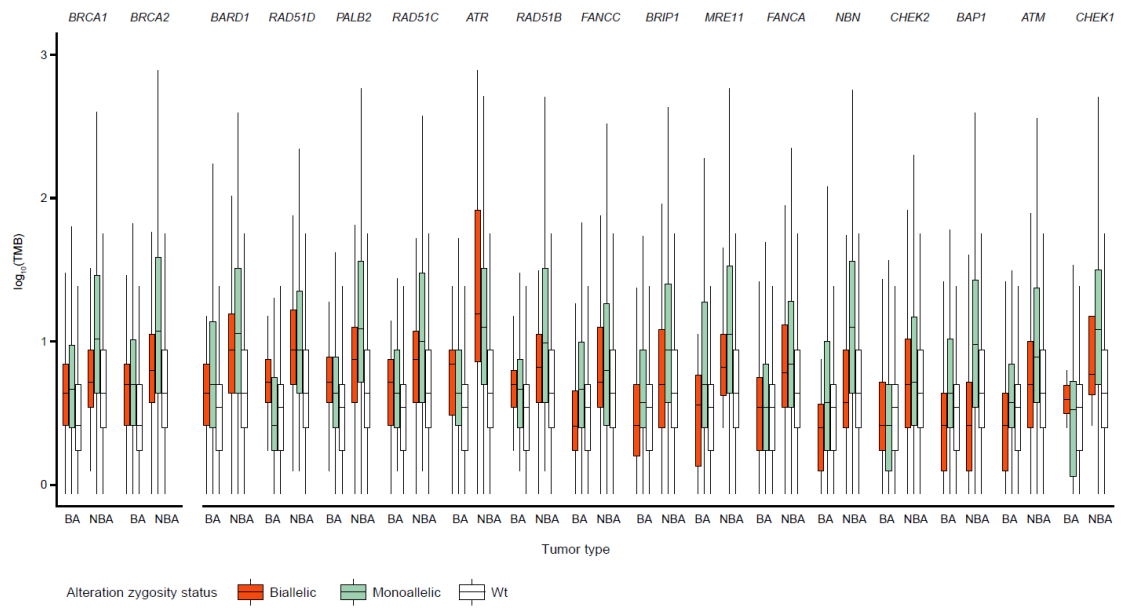

## Supplementary Tables

**Supplementary Table 1.** List of HRR-associated genes in the study.

|               |
|---------------|
| Gene          |
| <i>BRCA1</i>  |
| <i>BRCA2</i>  |
| <i>PALB2</i>  |
| <i>ATR</i>    |
| <i>ATRX</i>   |
| <i>ATM</i>    |
| <i>BAP1</i>   |
| <i>RAD51B</i> |
| <i>RAD51C</i> |
| <i>RAD51D</i> |
| <i>BRIP1</i>  |
| <i>NBN</i>    |
| <i>CHEK1</i>  |
| <i>CHEK2</i>  |
| <i>FANCA</i>  |
| <i>FANCC</i>  |
| <i>MRE11</i>  |
| <i>BARD1</i>  |

**Supplementary Table 2.** Association of alterations and median gLOH for HRR-associated genes in BA and NBA tumor types, stratified by allelic status.

| Gene          | Group | No. assessable biallelic | No. assessable monoallelic | No. assessable unknown | No. assessable wt | Median gLOH biallelic | Median gLOH monoallelic | Median gLOH unknown | Median gLOH wt | % change biallelic vs. wt | P-value biallelic vs. wt |
|---------------|-------|--------------------------|----------------------------|------------------------|-------------------|-----------------------|-------------------------|---------------------|----------------|---------------------------|--------------------------|
| <i>BRCA1</i>  | BA    | 1,666                    | 158                        | 342                    | 42,599            | 26.4                  | 8.1                     | 18.0                | 10.1           | +162%                     | 0                        |
| <i>BRCA2</i>  | BA    | 2,013                    | 283                        | 221                    | 42,248            | 18.5                  | 7.7                     | 14.2                | 10.0           | +85%                      | 5.6 x 10 <sup>-263</sup> |
| <i>PALB2</i>  | BA    | 259                      | 168                        | 52                     | 44,286            | 21.2                  | 12.1                    | 16.9                | 10.6           | +100%                     | 1.4 x 10 <sup>-54</sup>  |
| <i>ATR</i>    | BA    | 23                       | 249                        | 125                    | 44,368            | 20.9                  | 12.3                    | 18.9                | 10.8           | +93%                      | 3.3 x 10 <sup>-4</sup>   |
| <i>ATRX</i>   | BA    | 26                       | 0                          | 316                    | 44,423            | 8.6                   | N/A*                    | 12.4                | 10.6           | -18%                      | 3.9 x 10 <sup>-1</sup>   |
| <i>ATM</i>    | BA    | 823                      | 410                        | 173                    | 43,359            | 10.4                  | 8.1                     | 12.2                | 10.2           | +1%                       | 4.8 x 10 <sup>-1</sup>   |
| <i>BAP1</i>   | BA    | 294                      | 39                         | 87                     | 44,345            | 10.7                  | 7.0                     | 12.0                | 10.4           | +2%                       | 1.1 x 10 <sup>-1</sup>   |
| <i>RAD51B</i> | BA    | 111                      | 38                         | 29                     | 44,587            | 17.5                  | 6.4                     | 17.8                | 10.6           | +65%                      | 2.3 x 10 <sup>-13</sup>  |
| <i>RAD51C</i> | BA    | 111                      | 43                         | 44                     | 44,567            | 20.7                  | 8.6                     | 11.3                | 10.5           | +97%                      | 3.4 x 10 <sup>-23</sup>  |
| <i>RAD51D</i> | BA    | 81                       | 23                         | 16                     | 44,645            | 21.7                  | 9.4                     | 13.4                | 10.5           | +107%                     | 7.1 x 10 <sup>-18</sup>  |
| <i>BRIP1</i>  | BA    | 152                      | 112                        | 129                    | 44,372            | 15.5                  | 8.0                     | 11.8                | 10.5           | +48%                      | 1.1 x 10 <sup>-10</sup>  |
| <i>NBN</i>    | BA    | 30                       | 141                        | 55                     | 44,539            | 12.5                  | 10.6                    | 13.4                | 10.8           | +15%                      | 1.4 x 10 <sup>-1</sup>   |
| <i>CHEK1</i>  | BA    | 2                        | 12                         | 7                      | 44,744            | 21.4                  | 12.4                    | 12.1                | 10.2           | +109%                     | 5.1 x 10 <sup>-2</sup>   |
| <i>CHEK2</i>  | BA    | 342                      | 289                        | 232                    | 43,902            | 11.5                  | 8.2                     | 9.4                 | 10.5           | +9%                       | 3.3 x 10 <sup>-2</sup>   |
| <i>FANCA</i>  | BA    | 183                      | 149                        | 158                    | 44,275            | 12.0                  | 8.3                     | 17.3                | 10.2           | +17%                      | 1.5 x 10 <sup>-3</sup>   |
| <i>FANCC</i>  | BA    | 48                       | 94                         | 67                     | 44,556            | 17.2                  | 9.8                     | 18.2                | 10.5           | +62%                      | 6.2 x 10 <sup>-5</sup>   |
| <i>MRE11</i>  | BA    | 26                       | 73                         | 24                     | 44,642            | 13.6                  | 7.1                     | 14.2                | 10.6           | +28%                      | 1.9 x 10 <sup>-2</sup>   |
| <i>BARD1</i>  | BA    | 65                       | 85                         | 37                     | 44,578            | 25.7                  | 9.8                     | 12.0                | 10.8           | +137%                     | 3.1 x 10 <sup>-19</sup>  |
| <i>TP53</i>   | BA    | 25,480                   | 1,314                      | 1,230                  | 16,741            | 13.1                  | 0.4                     | 11.8                | 7.7            | +71%                      | 0                        |
| <i>CTNNA1</i> | BA    | 346                      | 54                         | 97                     | 44,268            | 16.9                  | 7.9                     | 18.1                | 10.5           | +61%                      | 8.0 x 10 <sup>-28</sup>  |
| <i>BRCA1</i>  | NBA   | 672                      | 677                        | 459                    | 114,217           | 22.0                  | 7.5                     | 11.3                | 7.3            | +201%                     | 7.8 x 10 <sup>-200</sup> |
| <i>BRCA2</i>  | NBA   | 970                      | 1,300                      | 325                    | 113,430           | 18.0                  | 5.4                     | 11.4                | 7.2            | +149%                     | 1.6 x 10 <sup>-219</sup> |
| <i>PALB2</i>  | NBA   | 156                      | 504                        | 85                     | 115,280           | 16.4                  | 6.9                     | 12.3                | 7.3            | +123%                     | 3.6 x 10 <sup>-32</sup>  |

|               |     |        |       |       |         |      |      |      |     |       |                       |
|---------------|-----|--------|-------|-------|---------|------|------|------|-----|-------|-----------------------|
| <i>ATR</i>    | NBA | 83     | 967   | 161   | 114,814 | 8.4  | 7.2  | 13.5 | 7.5 | +11%  | $2.6 \times 10^{-1}$  |
| <i>ATRX</i>   | NBA | 310    | 0     | 2,561 | 113,154 | 7.2  | N/A* | 7.3  | 7.3 | -1%   | $3.6 \times 10^{-1}$  |
| <i>ATM</i>    | NBA | 2,001  | 2,172 | 362   | 111,490 | 9.9  | 6.0  | 9.0  | 7.2 | +37%  | $1.2 \times 10^{-55}$ |
| <i>BAP1</i>   | NBA | 2,089  | 234   | 373   | 113,329 | 6.3  | 3.0  | 6.4  | 7.2 | -12%  | $1.0 \times 10^{-12}$ |
| <i>RAD51B</i> | NBA | 188    | 102   | 43    | 115,692 | 10.9 | 5.8  | 9.3  | 7.3 | +49%  | $2.8 \times 10^{-13}$ |
| <i>RAD51C</i> | NBA | 83     | 149   | 44    | 115,749 | 14.7 | 6.4  | 9.8  | 7.3 | +100% | $5.6 \times 10^{-12}$ |
| <i>RAD51D</i> | NBA | 23     | 141   | 32    | 115,829 | 18.9 | 6.7  | 10.0 | 7.3 | +157% | $3.4 \times 10^{-7}$  |
| <i>BRIP1</i>  | NBA | 131    | 646   | 116   | 115,132 | 12.0 | 7.3  | 10.9 | 7.3 | +63%  | $1.5 \times 10^{-7}$  |
| <i>NBN</i>    | NBA | 91     | 463   | 106   | 115,365 | 12.8 | 6.2  | 11.4 | 7.5 | +69%  | $1.4 \times 10^{-6}$  |
| <i>CHEK1</i>  | NBA | 4      | 55    | 10    | 115,956 | 2.6  | 7.6  | 11.6 | 7.2 | -63%  | $1.3 \times 10^{-1}$  |
| <i>CHEK2</i>  | NBA | 439    | 968   | 522   | 114,096 | 9.0  | 6.2  | 7.4  | 7.3 | +23%  | $3.2 \times 10^{-6}$  |
| <i>FANCA</i>  | NBA | 305    | 581   | 213   | 114,926 | 10.6 | 6.7  | 9.9  | 7.2 | +45%  | $1.3 \times 10^{-12}$ |
| <i>FANCC</i>  | NBA | 127    | 261   | 99    | 115,538 | 11.0 | 5.2  | 11.4 | 7.3 | +51%  | $6.5 \times 10^{-8}$  |
| <i>MRE11</i>  | NBA | 36     | 301   | 37    | 115,651 | 11.9 | 5.5  | 8.9  | 7.3 | +62%  | $4.2 \times 10^{-3}$  |
| <i>BARD1</i>  | NBA | 77     | 367   | 65    | 115,516 | 18.3 | 7.3  | 12.0 | 7.5 | +142% | $3.6 \times 10^{-14}$ |
| <i>TP53</i>   | NBA | 62,863 | 5,206 | 2,666 | 45,290  | 9.2  | 1.0  | 9.6  | 4.9 | +88%  | 0                     |
| <i>CTNNA1</i> | NBA | 428    | 255   | 149   | 115,193 | 11.8 | 5.1  | 11.8 | 7.1 | +65%  | $1.3 \times 10^{-34}$ |

\*X-chromosome gene, so monoallelic status cannot be assessed.

Abbreviations: N/A, not applicable; wt, wild type.

**Supplementary Table 3.** Association of alterations and median gLOH for HRR-associated genes in breast, ovarian, prostate, pancreatic, CRC, and NSCLC, stratified by allelic status.

| Gene          | Group  | No. assessable biallelic | No. assessable monoallelic | No. assessable unknown | No. assessable wt | Median gLOH biallelic | Median gLOH monoallelic | Median gLOH unknown | Median gLOH wt | % change biallelic vs. wt | P-value biallelic vs. wt |
|---------------|--------|--------------------------|----------------------------|------------------------|-------------------|-----------------------|-------------------------|---------------------|----------------|---------------------------|--------------------------|
| <i>BRCA1</i>  | Breast | 604                      | 82                         | 152                    | 19,776            | 29.3                  | 10.9                    | 18.6                | 11.7           | +150%                     | $2.3 \times 10^{-220}$   |
| <i>BRCA2</i>  | Breast | 791                      | 124                        | 105                    | 19,594            | 20.9                  | 11.2                    | 17.6                | 11.5           | +81%                      | $1.2 \times 10^{-140}$   |
| <i>PALB2</i>  | Breast | 172                      | 97                         | 30                     | 20,315            | 22.6                  | 14.7                    | 19.0                | 12.1           | +86%                      | $2.2 \times 10^{-43}$    |
| <i>ATR</i>    | Breast | 12                       | 121                        | 59                     | 20,422            | 15.6                  | 14.3                    | 24.3                | 12.4           | +25%                      | $4.0 \times 10^{-2}$     |
| <i>ATRX</i>   | Breast | 7                        | 0                          | 176                    | 20,431            | 22.0                  | N/A*                    | 13.9                | 12.1           | +81%                      | $1.0 \times 10^{-2}$     |
| <i>ATM</i>    | Breast | 341                      | 130                        | 67                     | 20,076            | 11.6                  | 8.3                     | 14.9                | 11.3           | +2%                       | $4.7 \times 10^{-1}$     |
| <i>BAP1</i>   | Breast | 155                      | 12                         | 36                     | 20,411            | 13.5                  | 5.4                     | 14.1                | 11.9           | +13%                      | $2.5 \times 10^{-2}$     |
| <i>RAD51B</i> | Breast | 79                       | 22                         | 13                     | 20,500            | 21.5                  | 6.9                     | 22.2                | 12.0           | +78%                      | $5.8 \times 10^{-10}$    |
| <i>RAD51C</i> | Breast | 29                       | 26                         | 31                     | 20,528            | 25.1                  | 9.7                     | 10.6                | 12.0           | +108%                     | $3.3 \times 10^{-7}$     |
| <i>RAD51D</i> | Breast | 18                       | 11                         | 9                      | 20,576            | 23.8                  | 8.9                     | 13.2                | 12.0           | +97%                      | $2.0 \times 10^{-4}$     |
| <i>BRIPI</i>  | Breast | 41                       | 49                         | 105                    | 20,419            | 14.0                  | 8.4                     | 11.9                | 12.0           | +16%                      | $2.6 \times 10^{-2}$     |
| <i>NBN</i>    | Breast | 4                        | 74                         | 26                     | 20,510            | 13.4                  | 12.2                    | 14.9                | 12.5           | +7%                       | $4.8 \times 10^{-1}$     |
| <i>CHEK1</i>  | Breast | 1                        | 6                          | 5                      | 20,602            | 22.6                  | 11.5                    | 12.1                | 11.3           | +99%                      | $1.3 \times 10^{-1}$     |
| <i>CHEK2</i>  | Breast | 241                      | 132                        | 111                    | 20,130            | 12.8                  | 9.5                     | 11.6                | 12.1           | +5%                       | $2.0 \times 10^{-1}$     |
| <i>FANCA</i>  | Breast | 97                       | 64                         | 90                     | 20,363            | 14.0                  | 13.0                    | 17.3                | 11.7           | +19%                      | $1.3 \times 10^{-2}$     |
| <i>FANCC</i>  | Breast | 21                       | 44                         | 31                     | 20,518            | 21.0                  | 10.5                    | 21.7                | 12.1           | +74%                      | $1.8 \times 10^{-3}$     |
| <i>MRE11</i>  | Breast | 18                       | 26                         | 14                     | 20,556            | 14.1                  | 10.7                    | 14.9                | 12.2           | +16%                      | $1.8 \times 10^{-1}$     |
| <i>BARD1</i>  | Breast | 51                       | 41                         | 14                     | 20,508            | 28.7                  | 10.5                    | 14.2                | 12.4           | +130%                     | $5.2 \times 10^{-16}$    |
| <i>TP53</i>   | Breast | 10,205                   | 627                        | 468                    | 9,314             | 16.2                  | 0.3                     | 15.2                | 8.7            | +86%                      | 0                        |
| <i>CTNNA1</i> | Breast | 291                      | 27                         | 71                     | 20,225            | 18.9                  | 6.0                     | 18.5                | 12.2           | +54%                      | $4.7 \times 10^{-23}$    |
| <i>BRCA1</i>  | Ovary  | 979                      | 23                         | 138                    | 10,287            | 25.2                  | 3.6                     | 20.8                | 9.3            | +170%                     | $4.9 \times 10^{-291}$   |
| <i>BRCA2</i>  | Ovary  | 490                      | 55                         | 37                     | 10,845            | 21.5                  | 5.4                     | 22.7                | 10.2           | +110%                     | $1.2 \times 10^{-86}$    |

|               |          |       |     |     |        |      |      |      |      |       |                       |
|---------------|----------|-------|-----|-----|--------|------|------|------|------|-------|-----------------------|
| <i>PALB2</i>  | Ovary    | 31    | 29  | 13  | 11,354 | 18.5 | 11.3 | 15.0 | 10.8 | +70%  | $2.2 \times 10^{-4}$  |
| <i>ATR</i>    | Ovary    | 9     | 56  | 39  | 11,323 | 21.4 | 15.6 | 19.6 | 11.1 | +91%  | $2.2 \times 10^{-2}$  |
| <i>ATRX</i>   | Ovary    | 7     | 0   | 73  | 11,347 | 6.4  | N/A* | 12.6 | 10.9 | -41%  | $2.6 \times 10^{-2}$  |
| <i>ATM</i>    | Ovary    | 89    | 103 | 51  | 11,184 | 10.3 | 11.2 | 18.4 | 10.8 | -4%   | $2.6 \times 10^{-1}$  |
| <i>BAP1</i>   | Ovary    | 26    | 15  | 25  | 11,361 | 8.9  | 18.8 | 11.7 | 10.9 | -18%  | $4.5 \times 10^{-1}$  |
| <i>RAD51B</i> | Ovary    | 10    | 8   | 9   | 11,400 | 27.9 | 4.9  | 20.0 | 10.8 | +157% | $2.1 \times 10^{-3}$  |
| <i>RAD51C</i> | Ovary    | 60    | 5   | 10  | 11,352 | 21.4 | 5.0  | 16.0 | 10.6 | +102% | $1.9 \times 10^{-12}$ |
| <i>RAD51D</i> | Ovary    | 57    | 3   | 6   | 11,361 | 21.6 | 6.5  | 21.0 | 10.6 | +104% | $3.2 \times 10^{-11}$ |
| <i>BRIP1</i>  | Ovary    | 97    | 9   | 17  | 11,304 | 17.0 | 2.8  | 13.9 | 10.6 | +60%  | $8.8 \times 10^{-6}$  |
| <i>NBN</i>    | Ovary    | 9     | 25  | 11  | 11,382 | 19.6 | 16.2 | 17.4 | 11.1 | +76%  | $4.9 \times 10^{-2}$  |
| <i>CHEK1</i>  | Ovary    | 1     | 2   | 2   | 11,422 | 20.1 | 23.5 | 25.3 | 10.8 | +86%  | $2.1 \times 10^{-1}$  |
| <i>CHEK2</i>  | Ovary    | 56    | 45  | 51  | 11,275 | 8.8  | 6.8  | 7.4  | 10.7 | -18%  | $5.7 \times 10^{-2}$  |
| <i>FANCA</i>  | Ovary    | 37    | 31  | 49  | 11,310 | 13.8 | 6.1  | 19.3 | 10.6 | +30%  | $1.0 \times 10^{-1}$  |
| <i>FANCC</i>  | Ovary    | 22    | 17  | 22  | 11,366 | 17.1 | 7.6  | 22.3 | 10.6 | +61%  | $6.8 \times 10^{-2}$  |
| <i>MRE11</i>  | Ovary    | 6     | 21  | 7   | 11,393 | 15.0 | 5.7  | 23.8 | 10.9 | +37%  | $1.0 \times 10^{-1}$  |
| <i>BARD1</i>  | Ovary    | 5     | 21  | 9   | 11,392 | 19.5 | 10.4 | 25.8 | 11.2 | +73%  | $2.1 \times 10^{-2}$  |
| <i>TP53</i>   | Ovary    | 8,524 | 241 | 266 | 2,396  | 14.2 | 0.8  | 13.6 | 2.7  | +433% | 0                     |
| <i>CTNNA1</i> | Ovary    | 13    | 7   | 19  | 11,388 | 12.4 | 3.7  | 18.2 | 10.7 | +14%  | $2.8 \times 10^{-1}$  |
| <i>BRCA1</i>  | Prostate | 20    | 31  | 30  | 6,353  | 16.5 | 7.2  | 9.9  | 8.6  | +92%  | $5.4 \times 10^{-5}$  |
| <i>BRCA2</i>  | Prostate | 521   | 51  | 54  | 5,808  | 10.3 | 7.4  | 8.2  | 7.5  | +37%  | $2.2 \times 10^{-37}$ |
| <i>PALB2</i>  | Prostate | 31    | 21  | 4   | 6,378  | 12.8 | 8.7  | 5.3  | 8.5  | +50%  | $1.7 \times 10^{-6}$  |
| <i>ATR</i>    | Prostate | 1     | 51  | 22  | 6,360  | 23.5 | 7.7  | 11.5 | 8.7  | +169% | $4.5 \times 10^{-2}$  |
| <i>ATRX</i>   | Prostate | 9     | 0   | 30  | 6,395  | 10.0 | N/A* | 9.8  | 8.5  | +17%  | $1.2 \times 10^{-1}$  |
| <i>ATM</i>    | Prostate | 248   | 91  | 38  | 6,057  | 9.0  | 6.7  | 8.0  | 8.5  | +5%   | $1.2 \times 10^{-1}$  |
| <i>BAP1</i>   | Prostate | 10    | 6   | 9   | 6,409  | 6.7  | 8.3  | 5.8  | 8.6  | -22%  | $3.4 \times 10^{-2}$  |
| <i>RAD51B</i> | Prostate | 14    | 6   | 5   | 6,409  | 12.0 | 7.6  | 8.3  | 8.7  | +38%  | $9.3 \times 10^{-3}$  |
| <i>RAD51C</i> | Prostate | 4     | 3   | 2   | 6,425  | 13.4 | 10.0 | 11.3 | 8.6  | +56%  | $4.7 \times 10^{-2}$  |
| <i>RAD51D</i> | Prostate | 2     | 5   | 0   | 6,427  | 18.3 | 4.2  | N/A  | 8.6  | +113% | $5.1 \times 10^{-2}$  |
| <i>BRIP1</i>  | Prostate | 2     | 29  | 6   | 6,397  | 17.4 | 8.6  | 6.6  | 8.6  | +103% | $2.4 \times 10^{-2}$  |
| <i>NBN</i>    | Prostate | 10    | 29  | 13  | 6,382  | 11.4 | 9.2  | 7.7  | 8.7  | +30%  | $1.9 \times 10^{-1}$  |

|               |          |       |     |     |        |      |      |      |     |       |                       |
|---------------|----------|-------|-----|-----|--------|------|------|------|-----|-------|-----------------------|
| <i>CHEK1</i>  | Prostate | 0     | 1   | 0   | 6,433  | N/A  | 1.5  | N/A  | 8.5 | N/A   | N/A                   |
| <i>CHEK2</i>  | Prostate | 23    | 68  | 38  | 6,305  | 8.8  | 7.1  | 7.1  | 8.5 | +2%   | $3.6 \times 10^{-1}$  |
| <i>FANCA</i>  | Prostate | 41    | 27  | 9   | 6,357  | 9.9  | 6.7  | 9.9  | 8.1 | +23%  | $5.2 \times 10^{-3}$  |
| <i>FANCC</i>  | Prostate | 3     | 21  | 9   | 6,401  | 17.1 | 8.4  | 14.7 | 8.7 | +97%  | $2.5 \times 10^{-2}$  |
| <i>MRE11</i>  | Prostate | 2     | 21  | 2   | 6,409  | 11.1 | 4.6  | 13.0 | 8.5 | +30%  | $2.1 \times 10^{-1}$  |
| <i>BARD1</i>  | Prostate | 5     | 11  | 10  | 6,408  | 11.1 | 4.2  | 8.9  | 8.5 | +30%  | $1.9 \times 10^{-1}$  |
| <i>TP53</i>   | Prostate | 2,434 | 170 | 245 | 3,585  | 9.3  | 5.8  | 9.0  | 7.8 | +18%  | $5.1 \times 10^{-31}$ |
| <i>CTNNA1</i> | Prostate | 33    | 16  | 5   | 6,380  | 7.8  | 8.7  | 10.2 | 8.1 | -3%   | $4.1 \times 10^{-1}$  |
| <i>BRCA1</i>  | Pancreas | 63    | 22  | 22  | 6,183  | 22.2 | 6.9  | 12.2 | 9.2 | +141% | $3.3 \times 10^{-22}$ |
| <i>BRCA2</i>  | Pancreas | 211   | 53  | 25  | 6,001  | 20.2 | 6.1  | 18.4 | 9.2 | +119% | $2.7 \times 10^{-82}$ |
| <i>PALB2</i>  | Pancreas | 25    | 21  | 5   | 6,239  | 16.1 | 10.0 | 13.0 | 9.4 | +71%  | $2.5 \times 10^{-6}$  |
| <i>ATR</i>    | Pancreas | 1     | 21  | 5   | 6,263  | 16.5 | 5.7  | 13.9 | 9.7 | +70%  | $1.3 \times 10^{-1}$  |
| <i>ATRX</i>   | Pancreas | 3     | 0   | 37  | 6,250  | 3.5  | N/A* | 9.1  | 9.3 | -62%  | $2.2 \times 10^{-1}$  |
| <i>ATM</i>    | Pancreas | 145   | 86  | 17  | 6,042  | 11.3 | 8.3  | 11.8 | 9.4 | +20%  | $1.9 \times 10^{-4}$  |
| <i>BAP1</i>   | Pancreas | 103   | 6   | 17  | 6,164  | 9.4  | 3.9  | 12.0 | 9.2 | +3%   | $3.3 \times 10^{-1}$  |
| <i>RAD51B</i> | Pancreas | 8     | 2   | 2   | 6,278  | 10.7 | 13.7 | 13.7 | 9.4 | +14%  | $2.5 \times 10^{-1}$  |
| <i>RAD51C</i> | Pancreas | 18    | 9   | 1   | 6,262  | 15.0 | 7.5  | 11.4 | 9.2 | +62%  | $1.3 \times 10^{-4}$  |
| <i>RAD51D</i> | Pancreas | 4     | 4   | 1   | 6,281  | 15.6 | 15.7 | 5.8  | 9.2 | +68%  | $1.8 \times 10^{-1}$  |
| <i>BRIP1</i>  | Pancreas | 12    | 25  | 1   | 6,252  | 13.6 | 8.1  | 0.0  | 9.2 | +47%  | $3.0 \times 10^{-3}$  |
| <i>NBN</i>    | Pancreas | 7     | 13  | 5   | 6,265  | 12.3 | 6.1  | 16.2 | 9.6 | +28%  | $1.3 \times 10^{-1}$  |
| <i>CHEK1</i>  | Pancreas | 0     | 3   | 0   | 6,287  | N/A  | 12.3 | N/A  | 9.4 | N/A   | N/A*                  |
| <i>CHEK2</i>  | Pancreas | 22    | 44  | 32  | 6,192  | 7.9  | 9.1  | 9.9  | 9.3 | -14%  | $1.7 \times 10^{-1}$  |
| <i>FANCA</i>  | Pancreas | 8     | 27  | 10  | 6,245  | 8.1  | 7.6  | 12.8 | 9.5 | -14%  | $1.7 \times 10^{-1}$  |
| <i>FANCC</i>  | Pancreas | 2     | 12  | 5   | 6,271  | 10.7 | 11.3 | 10.7 | 9.3 | +15%  | $4.7 \times 10^{-1}$  |
| <i>MRE11</i>  | Pancreas | 0     | 5   | 1   | 6,284  | N/A  | 7.1  | 6.1  | 9.3 | N/A   | N/A*                  |
| <i>BARD1</i>  | Pancreas | 4     | 12  | 4   | 6,270  | 19.4 | 9.7  | 8.1  | 9.9 | +96%  | $6.3 \times 10^{-3}$  |
| <i>TP53</i>   | Pancreas | 4,317 | 276 | 251 | 1,446  | 9.5  | 0.1  | 10.1 | 8.3 | +13%  | $1.2 \times 10^{-11}$ |
| <i>CTNNA1</i> | Pancreas | 9     | 4   | 2   | 6,275  | 14.1 | 11.1 | 15.9 | 9.5 | +48%  | $1.3 \times 10^{-1}$  |
| <i>BRCA1</i>  | CRC      | 91    | 105 | 81  | 20,666 | 14.6 | 5.4  | 7.1  | 6.0 | +144% | $4.8 \times 10^{-14}$ |
| <i>BRCA2</i>  | CRC      | 48    | 318 | 49  | 20,528 | 10.4 | 4.4  | 6.8  | 6.2 | +68%  | $9.7 \times 10^{-4}$  |



|               |       |        |     |     |        |      |      |      |      |       |                        |
|---------------|-------|--------|-----|-----|--------|------|------|------|------|-------|------------------------|
| <i>PALB2</i>  | CRC   | 8      | 91  | 16  | 20,828 | 10.4 | 3.9  | 6.9  | 6.1  | +71%  | $3.2 \times 10^{-2}$   |
| <i>ATR</i>    | CRC   | 9      | 136 | 14  | 20,784 | 1.5  | 3.5  | 10.0 | 6.3  | -75%  | $6.5 \times 10^{-2}$   |
| <i>ATRX</i>   | CRC   | 12     | 0   | 196 | 20,735 | 4.3  | N/A* | 4.5  | 6.1  | -29%  | $1.2 \times 10^{-1}$   |
| <i>ATM</i>    | CRC   | 439    | 499 | 55  | 19,950 | 8.3  | 4.6  | 7.4  | 6.1  | +36%  | $7.5 \times 10^{-18}$  |
| <i>BAP1</i>   | CRC   | 31     | 43  | 11  | 20,858 | 6.4  | 2.5  | 2.7  | 6.0  | +6%   | $3.4 \times 10^{-1}$   |
| <i>RAD51B</i> | CRC   | 36     | 8   | 10  | 20,889 | 8.6  | 2.9  | 9.5  | 6.1  | +40%  | $3.0 \times 10^{-3}$   |
| <i>RAD51C</i> | CRC   | 20     | 20  | 9   | 20,894 | 11.1 | 3.0  | 4.9  | 6.0  | +86%  | $2.0 \times 10^{-3}$   |
| <i>RAD51D</i> | CRC   | 3      | 25  | 8   | 20,907 | 18.9 | 5.7  | 7.9  | 6.0  | +215% | $1.5 \times 10^{-2}$   |
| <i>BRIP1</i>  | CRC   | 33     | 94  | 17  | 20,799 | 5.8  | 4.4  | 8.0  | 6.0  | -3%   | $3.0 \times 10^{-1}$   |
| <i>NBN</i>    | CRC   | 18     | 99  | 21  | 20,805 | 11.8 | 3.1  | 6.2  | 6.2  | +89%  | $9.4 \times 10^{-3}$   |
| <i>CHEK1</i>  | CRC   | 0      | 8   | 2   | 20,933 | N/A  | 7.6  | 13.9 | 6.1  | N/A   | N/A*                   |
| <i>CHEK2</i>  | CRC   | 60     | 128 | 85  | 20,670 | 6.6  | 5.0  | 6.9  | 6.1  | +9%   | $6.7 \times 10^{-2}$   |
| <i>FANCA</i>  | CRC   | 34     | 85  | 22  | 20,802 | 7.1  | 5.0  | 7.3  | 6.1  | +16%  | $7.0 \times 10^{-2}$   |
| <i>FANCC</i>  | CRC   | 6      | 66  | 5   | 20,866 | 7.1  | 4.7  | 10.6 | 6.2  | +14%  | $3.9 \times 10^{-1}$   |
| <i>MRE11</i>  | CRC   | 6      | 64  | 7   | 20,866 | 11.9 | 3.7  | 4.9  | 6.1  | +95%  | $2.8 \times 10^{-2}$   |
| <i>BARD1</i>  | CRC   | 10     | 70  | 16  | 20,847 | 17.7 | 3.5  | 8.8  | 6.3  | +181% | $1.1 \times 10^{-2}$   |
| <i>TP53</i>   | CRC   | 15,673 | 605 | 649 | 4,016  | 6.2  | 1.9  | 6.7  | 4.3  | +44%  | $2.1 \times 10^{-120}$ |
| <i>CTNNA1</i> | CRC   | 103    | 52  | 29  | 20,759 | 7.7  | 2.4  | 7.8  | 5.4  | +42%  | $2.0 \times 10^{-6}$   |
| <i>BRC1</i>   | NSCLC | 84     | 193 | 108 | 26,126 | 18.3 | 12.1 | 14.0 | 10.9 | +68%  | $1.0 \times 10^{-12}$  |
| <i>BRC2</i>   | NSCLC | 242    | 247 | 79  | 25,943 | 19.2 | 9.6  | 11.7 | 10.5 | +81%  | $9.2 \times 10^{-43}$  |
| <i>PALB2</i>  | NSCLC | 36     | 144 | 21  | 26,310 | 16.1 | 10.8 | 14.5 | 10.8 | +48%  | $4.9 \times 10^{-5}$   |
| <i>ATR</i>    | NSCLC | 24     | 269 | 56  | 26,162 | 15.1 | 11.8 | 15.2 | 11.0 | +37%  | $3.0 \times 10^{-3}$   |
| <i>ATRX</i>   | NSCLC | 28     | 0   | 417 | 26,066 | 10.8 | N/A* | 12.2 | 10.8 | +0%   | $1.0 \times 10^{-1}$   |
| <i>ATM</i>    | NSCLC | 559    | 571 | 101 | 25,280 | 10.7 | 9.3  | 13.0 | 10.8 | -1%   | $1.5 \times 10^{-1}$   |
| <i>BAP1</i>   | NSCLC | 276    | 31  | 44  | 26,160 | 8.7  | 4.0  | 9.0  | 10.6 | -17%  | $5.7 \times 10^{-5}$   |
| <i>RAD51B</i> | NSCLC | 28     | 24  | 12  | 26,447 | 16.2 | 10.4 | 9.2  | 10.8 | +49%  | $2.9 \times 10^{-4}$   |
| <i>RAD51C</i> | NSCLC | 7      | 42  | 15  | 26,447 | 26.0 | 11.4 | 12.3 | 10.9 | +138% | $1.7 \times 10^{-4}$   |
| <i>RAD51D</i> | NSCLC | 5      | 40  | 9   | 26,457 | 18.1 | 11.4 | 12.5 | 10.9 | +66%  | $1.4 \times 10^{-2}$   |
| <i>BRIP1</i>  | NSCLC | 23     | 206 | 27  | 26,255 | 18.5 | 11.7 | 16.9 | 10.9 | +70%  | $1.4 \times 10^{-4}$   |

|               |       |        |       |     |        |      |      |      |      |      |                      |
|---------------|-------|--------|-------|-----|--------|------|------|------|------|------|----------------------|
| <i>NBN</i>    | NSCLC | 33     | 118   | 34  | 26,326 | 15.7 | 10.1 | 11.4 | 11.1 | +41% | $8.6 \times 10^{-3}$ |
| <i>CHEK1</i>  | NSCLC | 0      | 19    | 1   | 26,491 | N/A  | 9.7  | 18.8 | 10.8 | N/A  | N/A*                 |
| <i>CHEK2</i>  | NSCLC | 107    | 232   | 114 | 26,058 | 12.5 | 9.7  | 10.6 | 10.8 | +15% | $7.1 \times 10^{-3}$ |
| <i>FANCA</i>  | NSCLC | 97     | 147   | 58  | 26,209 | 14.6 | 10.4 | 15.5 | 10.7 | +36% | $1.3 \times 10^{-5}$ |
| <i>FANCC</i>  | NSCLC | 48     | 43    | 34  | 26,386 | 13.3 | 9.1  | 12.8 | 10.6 | +24% | $3.6 \times 10^{-3}$ |
| <i>MRE11</i>  | NSCLC | 13     | 67    | 8   | 26,423 | 12.3 | 10.4 | 15.8 | 10.8 | +13% | $2.3 \times 10^{-1}$ |
| <i>BARD1</i>  | NSCLC | 16     | 129   | 15  | 26,351 | 18.3 | 11.5 | 16.5 | 11.2 | +63% | $4.8 \times 10^{-4}$ |
| <i>TP53</i>   | NSCLC | 16,742 | 1,586 | 807 | 7,376  | 12.7 | 0.2  | 12.1 | 7.2  | +76% | 0                    |
| <i>CTNNA1</i> | NSCLC | 63     | 44    | 31  | 26,373 | 13.4 | 9.6  | 14.3 | 10.7 | +25% | $8.8 \times 10^{-3}$ |

\*X-chromosome gene, so monoallelic status cannot be assessed.

Abbreviations: N/A, not applicable; wt, wild type.

**Supplementary Table 4.** Association of alterations and median gLOH for *ATM* for all tumor types, stratified by allelic status.

| <b>Group</b>       | <b>No. assessable biallelic</b> | <b>No. assessable monoallelic</b> | <b>No. assessable unknown</b> | <b>No. assessable wt</b> | <b>Median gLOH biallelic</b> | <b>Median gLOH monoallelic</b> | <b>Median gLOH unknown</b> | <b>Median gLOH wt</b> | <b>% change biallelic vs. wt</b> | <b>P-value biallelic vs. wt</b> | <b>Corrected P-value biallelic vs. wt</b> |
|--------------------|---------------------------------|-----------------------------------|-------------------------------|--------------------------|------------------------------|--------------------------------|----------------------------|-----------------------|----------------------------------|---------------------------------|-------------------------------------------|
| Stomach            | 53                              | 33                                | 5                             | 1,758                    | 15.7                         | 4.7                            | 12.1                       | 8.9                   | +77%                             | 4.7 x 10 <sup>-6</sup>          | 1.5 x 10 <sup>-5</sup>                    |
| Glioma             | 36                              | 98                                | 13                            | 6,960                    | 5.0                          | 3.7                            | 5.2                        | 2.9                   | +69%                             | 2.3 x 10 <sup>-3</sup>          | 4.0 x 10 <sup>-3</sup>                    |
| CUP                | 150                             | 147                               | 19                            | 8,217                    | 12.5                         | 6.7                            | 12.2                       | 9.4                   | +33%                             | 2.0 x 10 <sup>-5</sup>          | 5.5 x 10 <sup>-5</sup>                    |
| Cholangiocarcinoma | 37                              | 30                                | 6                             | 2,346                    | 11.9                         | 7.3                            | 11.0                       | 9.9                   | +19%                             | 2.5 x 10 <sup>-3</sup>          | 4.0 x 10 <sup>-3</sup>                    |
| Bladder            | 76                              | 82                                | 13                            | 3,106                    | 10.8                         | 7.4                            | 13.2                       | 7.7                   | +39%                             | 9.3 x 10 <sup>-5</sup>          | 2.1 x 10 <sup>-4</sup>                    |
| Breast             | 341                             | 130                               | 67                            | 20,076                   | 11.6                         | 8.3                            | 14.9                       | 11.3                  | +2%                              | 4.7 x 10 <sup>-1</sup>          | 4.7 x 10 <sup>-1</sup>                    |
| Esophagus          | 58                              | 71                                | 17                            | 4,619                    | 17.6                         | 9.4                            | 16.8                       | 11.7                  | +50%                             | 1.2 x 10 <sup>-6</sup>          | 6.6 x 10 <sup>-6</sup>                    |
| Prostate           | 248                             | 91                                | 38                            | 6,057                    | 9.0                          | 6.7                            | 8.0                        | 8.5                   | +5%                              | 1.2 x 10 <sup>-1</sup>          | 1.5 x 10 <sup>-1</sup>                    |
| Kidney             | 36                              | 30                                | 9                             | 2,407                    | 9.8                          | 4.8                            | 6.8                        | 4.3                   | +125%                            | 3.4 x 10 <sup>-6</sup>          | 1.4 x 10 <sup>-5</sup>                    |
| Pancreas           | 145                             | 86                                | 17                            | 6,042                    | 11.3                         | 8.3                            | 11.8                       | 9.4                   | +20%                             | 1.9 x 10 <sup>-4</sup>          | 3.8 x 10 <sup>-4</sup>                    |
| NSCLC              | 559                             | 571                               | 101                           | 25,280                   | 10.7                         | 9.3                            | 13.0                       | 10.8                  | -1%                              | 1.5 x 10 <sup>-1</sup>          | 1.8 x 10 <sup>-1</sup>                    |
| Endometrial        | 92                              | 141                               | 17                            | 4,540                    | 8.8                          | 2.4                            | 8.6                        | 6.0                   | +46%                             | 2.1 x 10 <sup>-2</sup>          | 2.8 x 10 <sup>-2</sup>                    |
| Melanoma           | 106                             | 73                                | 18                            | 4,944                    | 6.3                          | 5.3                            | 5.2                        | 5.5                   | +13%                             | 9.7 x 10 <sup>-3</sup>          | 1.4 x 10 <sup>-2</sup>                    |
| CRC                | 439                             | 499                               | 55                            | 19,950                   | 8.3                          | 4.6                            | 7.4                        | 6.1                   | +36%                             | 7.5 x 10 <sup>-18</sup>         | 1.2 x 10 <sup>-16</sup>                   |
| Ovary              | 89                              | 103                               | 51                            | 11,184                   | 10.3                         | 11.2                           | 18.4                       | 10.8                  | -4%                              | 2.6 x 10 <sup>-1</sup>          | 2.8 x 10 <sup>-1</sup>                    |
| Other              | 359                             | 397                               | 89                            | 27,363                   | 9.3                          | 6.1                            | 8.3                        | 6.1                   | +52%                             | 4.6 x 10 <sup>-14</sup>         | 3.7 x 10 <sup>-13</sup>                   |

Abbreviations: CUP, carcinoma-of-unknown-primary-origin; wt, wild type.

**Supplementary Table 5.** Association of alterations and median gLOH for *CHEK2* for all tumor types, stratified by allelic status.

| Group              | No. assessable biallelic | No. assessable monoallelic | No. assessable unknown | No. assessable wt | Median gLOH biallelic | Median gLOH monoallelic | Median gLOH unknown | Median gLOH wt | % change biallelic vs. wt | P-value biallelic vs. wt | Corrected P-value biallelic vs. wt |
|--------------------|--------------------------|----------------------------|------------------------|-------------------|-----------------------|-------------------------|---------------------|----------------|---------------------------|--------------------------|------------------------------------|
| Stomach            | 10                       | 15                         | 10                     | 1,814             | 16.7                  | 2.6                     | 5.1                 | 9.1            | +82%                      | $6.1 \times 10^{-2}$     | $1.5 \times 10^{-1}$               |
| Glioma             | 21                       | 69                         | 39                     | 6,978             | 5.0                   | 2.3                     | 2.7                 | 2.9            | +69%                      | $8.3 \times 10^{-2}$     | $1.7 \times 10^{-1}$               |
| CUP                | 37                       | 76                         | 35                     | 8,385             | 8.8                   | 6.7                     | 9.0                 | 9.6            | -9%                       | $4.3 \times 10^{-1}$     | $4.3 \times 10^{-1}$               |
| Cholangiocarcinoma | 11                       | 17                         | 11                     | 2,380             | 8.9                   | 10.6                    | 10.3                | 10.1           | -11%                      | $3.3 \times 10^{-1}$     | $3.9 \times 10^{-1}$               |
| Bladder            | 21                       | 53                         | 20                     | 3,183             | 7.3                   | 7.1                     | 10.0                | 8.0            | -9%                       | $3.5 \times 10^{-1}$     | $3.9 \times 10^{-1}$               |
| Breast             | 241                      | 132                        | 111                    | 20,130            | 12.8                  | 9.5                     | 11.6                | 12.1           | +5%                       | $2.0 \times 10^{-1}$     | $3.2 \times 10^{-1}$               |
| Esophagus          | 16                       | 25                         | 12                     | 4,712             | 13.0                  | 10.6                    | 17.1                | 12.1           | +7%                       | $2.4 \times 10^{-1}$     | $3.4 \times 10^{-1}$               |
| Prostate           | 23                       | 68                         | 38                     | 6,305             | 8.8                   | 7.1                     | 7.1                 | 8.5            | +2%                       | $3.6 \times 10^{-1}$     | $3.9 \times 10^{-1}$               |
| Kidney             | 18                       | 26                         | 9                      | 2,429             | 8.2                   | 4.3                     | 6.1                 | 4.5            | +80%                      | $7.0 \times 10^{-3}$     | $5.2 \times 10^{-2}$               |
| Pancreas           | 22                       | 44                         | 32                     | 6,192             | 7.9                   | 9.1                     | 9.9                 | 9.3            | -14%                      | $1.7 \times 10^{-1}$     | $3.0 \times 10^{-1}$               |
| NSCLC              | 107                      | 232                        | 114                    | 26,058            | 12.5                  | 9.7                     | 10.6                | 10.8           | +15%                      | $7.1 \times 10^{-3}$     | $5.2 \times 10^{-2}$               |
| Endometrial        | 17                       | 55                         | 23                     | 4,695             | 10.0                  | 2.8                     | 4.2                 | 6.0            | +65%                      | $3.9 \times 10^{-2}$     | $1.5 \times 10^{-1}$               |
| Melanoma           | 12                       | 62                         | 36                     | 5,031             | 11.6                  | 6.5                     | 6.6                 | 6.0            | +93%                      | $9.8 \times 10^{-3}$     | $5.2 \times 10^{-2}$               |
| CRC                | 60                       | 128                        | 85                     | 20,670            | 6.6                   | 5.0                     | 6.9                 | 6.1            | +9%                       | $6.7 \times 10^{-2}$     | $1.5 \times 10^{-1}$               |
| Ovary              | 56                       | 45                         | 51                     | 11,275            | 8.8                   | 6.8                     | 7.4                 | 10.7           | -18%                      | $5.7 \times 10^{-2}$     | $1.5 \times 10^{-1}$               |
| Other              | 109                      | 210                        | 128                    | 27,761            | 7.1                   | 5.0                     | 6.7                 | 6.4            | +10%                      | $2.6 \times 10^{-1}$     | $3.5 \times 10^{-1}$               |

Abbreviations: CUP, carcinoma-of-unknown-primary-origin; wt, wild type.

**Supplementary Table 6.** Association of alterations and median gLOH for *BAP1* for all tumor types, stratified by allelic status.

| <b>Group</b>       | <b>No. assessable biallelic</b> | <b>No. assessable monoallelic</b> | <b>No. assessable unknown</b> | <b>No. assessable wt</b> | <b>Median gLOH biallelic</b> | <b>Median gLOH monoallelic</b> | <b>Median gLOH unknown</b> | <b>Median gLOH wt</b> | <b>% change biallelic vs. wt</b> | <b>P-value biallelic vs. wt</b> | <b>Corrected P-value biallelic vs. wt</b> |
|--------------------|---------------------------------|-----------------------------------|-------------------------------|--------------------------|------------------------------|--------------------------------|----------------------------|-----------------------|----------------------------------|---------------------------------|-------------------------------------------|
| Stomach            | 26                              | 6                                 | 3                             | 1,814                    | 6.7                          | 0.6                            | 1.0                        | 8.9                   | -25%                             | 4.6 x 10 <sup>-1</sup>          | 4.9 x 10 <sup>-1</sup>                    |
| Glioma             | 3                               | 4                                 | 6                             | 7,094                    | 11.4                         | 4.0                            | 4.2                        | 3.0                   | +286%                            | 2.9 x 10 <sup>-2</sup>          | 5.7 x 10 <sup>-2</sup>                    |
| CUP                | 312                             | 15                                | 51                            | 8,155                    | 7.5                          | 0.9                            | 6.5                        | 9.4                   | -19%                             | 2.4 x 10 <sup>-5</sup>          | 1.9 x 10 <sup>-4</sup>                    |
| Cholangiocarcinoma | 305                             | 10                                | 75                            | 2,029                    | 8.2                          | 10.0                           | 8.5                        | 9.7                   | -14%                             | 4.0 x 10 <sup>-5</sup>          | 2.1 x 10 <sup>-4</sup>                    |
| Bladder            | 40                              | 22                                | 11                            | 3,204                    | 8.4                          | 7.2                            | 9.4                        | 8.0                   | +5%                              | 4.9 x 10 <sup>-1</sup>          | 4.9 x 10 <sup>-1</sup>                    |
| Breast             | 155                             | 12                                | 36                            | 20,411                   | 13.5                         | 5.4                            | 14.1                       | 11.9                  | +13%                             | 2.5 x 10 <sup>-2</sup>          | 5.7 x 10 <sup>-2</sup>                    |
| Esophagus          | 31                              | 8                                 | 6                             | 4,720                    | 9.9                          | 1.6                            | 13.9                       | 11.9                  | -16%                             | 1.1 x 10 <sup>-1</sup>          | 1.7 x 10 <sup>-1</sup>                    |
| Prostate           | 10                              | 6                                 | 9                             | 6,409                    | 6.7                          | 8.3                            | 5.8                        | 8.6                   | -22%                             | 3.4 x 10 <sup>-2</sup>          | 6.0 x 10 <sup>-2</sup>                    |
| Kidney             | 205                             | 8                                 | 19                            | 2,250                    | 4.2                          | 0.0                            | 5.4                        | 3.8                   | +9%                              | 1.7 x 10 <sup>-2</sup>          | 4.6 x 10 <sup>-2</sup>                    |
| Pancreas           | 103                             | 6                                 | 17                            | 6,164                    | 9.4                          | 3.9                            | 12.0                       | 9.2                   | +3%                              | 3.3 x 10 <sup>-1</sup>          | 4.2 x 10 <sup>-1</sup>                    |
| NSCLC              | 276                             | 31                                | 44                            | 26,160                   | 8.7                          | 4.0                            | 9.0                        | 10.6                  | -17%                             | 5.7 x 10 <sup>-5</sup>          | 2.3 x 10 <sup>-4</sup>                    |
| Endometrial        | 6                               | 15                                | 7                             | 4,762                    | 2.8                          | 2.5                            | 13.3                       | 6.0                   | -52%                             | 1.7 x 10 <sup>-1</sup>          | 2.4 x 10 <sup>-1</sup>                    |
| Melanoma           | 212                             | 19                                | 50                            | 4,860                    | 2.4                          | 7.5                            | 2.1                        | 6.3                   | -61%                             | 1.4 x 10 <sup>-41</sup>         | 2.2 x 10 <sup>-40</sup>                   |
| CRC                | 31                              | 43                                | 11                            | 20,858                   | 6.4                          | 2.5                            | 2.7                        | 6.0                   | +6%                              | 3.4 x 10 <sup>-1</sup>          | 4.2 x 10 <sup>-1</sup>                    |
| Ovary              | 26                              | 15                                | 25                            | 11,361                   | 8.9                          | 18.8                           | 11.7                       | 10.9                  | -18%                             | 4.6 x 10 <sup>-1</sup>          | 4.9 x 10 <sup>-1</sup>                    |
| Other              | 642                             | 53                                | 90                            | 27,423                   | 5.7                          | 3.1                            | 5.7                        | 6.2                   | -8%                              | 3.6 x 10 <sup>-3</sup>          | 1.2 x 10 <sup>-2</sup>                    |

Abbreviations: CUP, carcinoma-of-unknown-primary-origin; wt, wild type.

**Supplementary Table 7.** Association of alterations and median gLOH for *CTNNA1* for all tumor types, stratified by allelic status.

| Group              | No. assessable biallelic | No. assessable monoallelic | No. assessable unknown | No. assessable wt | Median gLOH biallelic | Median gLOH monoallelic | Median gLOH unknown | Median gLOH wt | % change biallelic vs. wt | P-value biallelic vs. wt | Corrected P-value biallelic vs. wt |
|--------------------|--------------------------|----------------------------|------------------------|-------------------|-----------------------|-------------------------|---------------------|----------------|---------------------------|--------------------------|------------------------------------|
| Stomach            | 17                       | 9                          | 4                      | 1,819             | 12.4                  | 5.5                     | 5.9                 | 9.0            | +37%                      | 1.1 x 10 <sup>-2</sup>   | 2.4 x 10 <sup>-2</sup>             |
| Glioma             | 2                        | 14                         | 2                      | 7,089             | 9.5                   | 4.8                     | 7.6                 | 3.1            | +212%                     | 4.6 x 10 <sup>-1</sup>   | 4.9 x 10 <sup>-1</sup>             |
| CUP                | 67                       | 18                         | 9                      | 8,439             | 15.4                  | 4.8                     | 11.5                | 9.6            | +60%                      | 1.5 x 10 <sup>-9</sup>   | 1.2 x 10 <sup>-8</sup>             |
| Cholangiocarcinoma | 9                        | 3                          | 2                      | 2,405             | 15.7                  | 13.5                    | 19.0                | 10.1           | +56%                      | 1.5 x 10 <sup>-2</sup>   | 3.0 x 10 <sup>-2</sup>             |
| Bladder            | 7                        | 15                         | 3                      | 3,252             | 9.9                   | 7.1                     | 18.2                | 8.0            | +24%                      | 1.3 x 10 <sup>-1</sup>   | 1.9 x 10 <sup>-1</sup>             |
| Breast             | 291                      | 27                         | 71                     | 20,225            | 18.9                  | 6.0                     | 18.5                | 12.2           | +54%                      | 4.6 x 10 <sup>-23</sup>  | 7.4 x 10 <sup>-22</sup>            |
| Esophagus          | 65                       | 15                         | 21                     | 4,664             | 16.5                  | 4.2                     | 12.6                | 11.9           | +38%                      | 1.5 x 10 <sup>-4</sup>   | 4.7 x 10 <sup>-4</sup>             |
| Prostate           | 33                       | 16                         | 5                      | 6,380             | 7.8                   | 8.7                     | 10.2                | 8.1            | -3%                       | 4.1 x 10 <sup>-1</sup>   | 4.9 x 10 <sup>-1</sup>             |
| Kidney             | 0                        | 1                          | 0                      | 2,481             | N/A                   | 6.7                     | N/A                 | 4.6            | N/A                       | N/A                      | 1.0                                |
| Pancreas           | 9                        | 4                          | 2                      | 6,275             | 14.1                  | 11.1                    | 15.9                | 9.5            | +48%                      | 1.3 x 10 <sup>-1</sup>   | 1.9 x 10 <sup>-1</sup>             |
| NSCLC              | 63                       | 44                         | 31                     | 26,373            | 13.4                  | 9.6                     | 14.3                | 10.7           | +25%                      | 8.8 x 10 <sup>-3</sup>   | 2.3 x 10 <sup>-2</sup>             |
| Endometrial        | 8                        | 19                         | 7                      | 4,756             | 10.2                  | 1.6                     | 15.2                | 6.1            | +65%                      | 5.1 x 10 <sup>-2</sup>   | 9.1 x 10 <sup>-2</sup>             |
| Melanoma           | 4                        | 10                         | 3                      | 5,124             | 7.7                   | 6.4                     | 9.8                 | 5.9            | +29%                      | 4.4 x 10 <sup>-1</sup>   | 4.9 x 10 <sup>-1</sup>             |
| CRC                | 103                      | 52                         | 29                     | 20,759            | 7.7                   | 2.4                     | 7.8                 | 5.4            | +42%                      | 2.0 x 10 <sup>-6</sup>   | 8.0 x 10 <sup>-6</sup>             |
| Ovary              | 13                       | 7                          | 19                     | 11,388            | 12.4                  | 3.7                     | 18.2                | 10.7           | +14%                      | 2.8 x 10 <sup>-1</sup>   | 3.7 x 10 <sup>-1</sup>             |
| Other              | 83                       | 55                         | 38                     | 28,032            | 11.0                  | 5.9                     | 12.8                | 6.4            | +71%                      | 2.2 x 10 <sup>-8</sup>   | 1.2 x 10 <sup>-7</sup>             |

Abbreviations: CUP, carcinoma-of-unknown-primary-origin; N/A, not applicable; wt, wild type.

**Supplementary Table 8.** Association of alterations and median gLOH for *TP53* for all tumor types, stratified by allelic status.

| Group              | No. assessable biallelic | No. assessable monoallelic | No. assessable unknown | No. assessable wt | Median gLOH biallelic | Median gLOH monoallelic | Median gLOH unknown | Median gLOH wt | % change biallelic vs. wt | <i>P</i> -value biallelic vs. wt | Corrected <i>P</i> -value biallelic vs. wt |
|--------------------|--------------------------|----------------------------|------------------------|-------------------|-----------------------|-------------------------|---------------------|----------------|---------------------------|----------------------------------|--------------------------------------------|
| Stomach            | 1,057                    | 182                        | 79                     | 531               | 11.0                  | 0.1                     | 11.3                | 6.3            | +73%                      | 1.4x10 <sup>-14</sup>            | 1.7 x 10 <sup>-14</sup>                    |
| Glioma             | 2,556                    | 393                        | 62                     | 4,096             | 4.0                   | 2.5                     | 3.9                 | 2.4            | +64%                      | 9.1x10 <sup>-71</sup>            | 1.8 x 10 <sup>-70</sup>                    |
| CUP                | 4,719                    | 365                        | 193                    | 3,256             | 11.5                  | 0.5                     | 11.8                | 7.3            | +58%                      | 6.8x10 <sup>-151</sup>           | 1.8 x 10 <sup>-150</sup>                   |
| Cholangiocarcinoma | 679                      | 98                         | 50                     | 1,592             | 10.5                  | 0.8                     | 8.9                 | 9.9            | +6%                       | 1.7x10 <sup>-3</sup>             | 1.7 x 10 <sup>-3</sup>                     |
| Bladder            | 1,834                    | 148                        | 70                     | 1,225             | 9.4                   | 3.3                     | 11.0                | 5.7            | +64%                      | 1.9x10 <sup>-53</sup>            | 3.4 x 10 <sup>-53</sup>                    |
| Breast             | 10,205                   | 627                        | 468                    | 9,314             | 16.2                  | 0.3                     | 15.2                | 8.7            | +86%                      | 0                                | 0                                          |
| Esophagus          | 3,703                    | 331                        | 162                    | 569               | 12.6                  | 0.2                     | 11.7                | 10.5           | +19%                      | 3.0x10 <sup>-9</sup>             | 3.1 x 10 <sup>-9</sup>                     |
| Prostate           | 2,434                    | 170                        | 245                    | 3,585             | 9.3                   | 5.8                     | 9.0                 | 7.8            | +18%                      | 5.1x10 <sup>-31</sup>            | 7.5 x 10 <sup>-31</sup>                    |
| Kidney             | 499                      | 77                         | 19                     | 1,887             | 7.5                   | 1.6                     | 4.9                 | 4.0            | +84%                      | 2.5x10 <sup>-32</sup>            | 4.0 x 10 <sup>-32</sup>                    |
| Pancreas           | 4,317                    | 276                        | 251                    | 1,446             | 9.5                   | 0.1                     | 10.1                | 8.3            | +13%                      | 1.3x10 <sup>-11</sup>            | 1.4 x 10 <sup>-11</sup>                    |
| NSCLC              | 16,742                   | 1,586                      | 807                    | 7,376             | 12.7                  | 0.2                     | 12.1                | 7.2            | +76%                      | 0                                | 0                                          |
| Endometrial        | 2,522                    | 229                        | 73                     | 1,966             | 10.9                  | 2.2                     | 12.6                | 2.4            | +361%                     | 0                                | 0                                          |
| Melanoma           | 846                      | 156                        | 37                     | 4,102             | 7.2                   | 6.1                     | 5.9                 | 5.7            | +27%                      | 1.7x10 <sup>-17</sup>            | 2.3 x 10 <sup>-17</sup>                    |
| CRC                | 15,673                   | 605                        | 649                    | 4,016             | 6.2                   | 1.9                     | 6.7                 | 4.3            | +44%                      | 2.1x10 <sup>-120</sup>           | 4.9 x 10 <sup>-120</sup>                   |
| Ovary              | 8,524                    | 241                        | 266                    | 2,396             | 14.2                  | 0.8                     | 13.6                | 2.7            | +433%                     | 0                                | 0                                          |
| Other              | 12,033                   | 1,036                      | 465                    | 14,674            | 9.0                   | 2.5                     | 9.9                 | 4.3            | +108%                     | 0                                | 0                                          |

Abbreviations: CUP, carcinoma-of-unknown-primary-origin; wt, wild type.
